# Supplementary material
Source: ML conference proceedings conference paper supplement (https://proceedings.neurips.cc/paper_files/paper/2023/hash/c11f8d40c119867e30e3421f696f931d-Abstract.html)
Supplement: Supplementary file 1 [file c11f8d40c119867e30e3421f696f931d-Supplemental-Conference.pdf]

---

# Provable benefits of score matching

---

Anonymous Author(s)

Affiliation

Address

email

## Abstract

Score matching is an alternative to maximum likelihood (ML) for estimating a probability distribution parametrized up to a constant of proportionality. By fitting the “score” of the distribution, it sidesteps the need to compute this constant of proportionality (which is often intractable). While score matching and variants thereof are popular in practice, precise theoretical understanding of the benefits and tradeoffs with maximum likelihood—both computational and statistical—are not well understood. In this work, we give the first example of a natural exponential family of distributions such that the score matching loss is computationally efficient to optimize, and has a comparable statistical efficiency to ML, while the ML loss is intractable to optimize using a gradient-based method. The family consists of exponentials of polynomials of fixed degree, and our result can be viewed as a continuous analogue of recent developments in the discrete setting. Precisely, we show: (1) Designing a zeroth-order or first-order oracle for optimizing the maximum likelihood loss is NP-hard. (2) Maximum likelihood has a statistical efficiency polynomial in the ambient dimension and the radius of the parameters of the family. (3) Minimizing the score matching loss is both computationally and statistically efficient, with complexity polynomial in the ambient dimension.

## 1 Introduction

Energy-based models are a flexible class of probabilistic models with wide-ranging applications. They are parameterized by a class of energies  $E_\theta(x)$  which in turn determines the distribution

$$p_\theta(x) = \frac{\exp(-E_\theta(x))}{Z_\theta}$$

up to a constant of proportionality  $Z_\theta$  that is called the partition function. One of the major challenges of working with energy-based models is designing efficient algorithms for fitting them to data. Statistical theory tells us that the maximum likelihood estimator (MLE)—i.e., the parameters  $\theta$  which maximize the likelihood—enjoys good statistical properties including consistency and asymptotic efficiency.

However, there is a major computational impediment to computing the MLE: Both evaluating the log-likelihood and computing its gradient with respect to  $\theta$  (i.e., implementing zeroth and first order oracles, respectively) seem to require computing the partition function, which is often computationally intractable. More precisely, the gradient of the negative log-likelihood depends on  $\nabla_\theta \log Z_\theta = \mathbb{E}_{p_\theta}[\nabla_\theta E_\theta(x)]$ . A popular approach is to estimate this quantity by using a Markov chain to approximately sample from  $p_\theta$ . However in high-dimensional settings, Markov chains often require many, sometimes even exponentially many, steps to mix.

Score matching (Hyvärinen, 2005) is a popular alternative that sidesteps needing to compute the partition function of sample from  $p_\theta$ . The idea is to fit the score of the distribution, in the sense that

we want  $\theta$  such that  $\nabla_x \log p(x)$  matches  $\nabla_x \log p_\theta(x)$  for a typical sample from  $p$ . This approach turns out to have many nice properties. It is consistent in the sense that minimizing the objective function yields provably good estimates for the unknown parameters. Moreover, while the definition depends on the unknown  $\nabla_x \log p(x)$ , by applying integration by parts, it is possible to transform the objective into an equivalent one that can be estimated from samples.

The main question is to bound its statistical performance, especially relative to that of the maximum likelihood estimator. Recent work by [Koehler et al. \(2022\)](#) showed that the cost can be quite steep. They gave explicit examples of distributions that have bad isoperimetric properties (i.e., large Poincaré constant) and showed how such properties can cause poor statistical performance.

Despite wide usage, there is little rigorous understanding of when score matching *helps*. This amounts to finding a general setting where maximizing the likelihood with standard first-order optimization is provably hard, and yet score matching is both computationally and statistically efficient, with only a polynomial loss in sample complexity relative to the MLE. In this work, we show the first such guarantees, and we do so for a natural class of exponential families defined by polynomials. As we discuss in Section 1.1, our results parallel recent developments in learning graphical models—where it is known that pseudolikelihood methods allow efficient learning of distributions that are hard to sample from—and can be viewed as a continuous analogue of such results.

In general, an exponential family on  $\mathbb{R}^n$  has the form  $p_\theta(x) \propto h(x) \exp(\langle \theta, T(x) \rangle)$  where  $h(x)$  is the *base measure*,  $\theta$  is the *parameter vector*, and  $T(x)$  is the vector of *sufficient statistics*. Exponential families are one of the most classic parametric families of distributions, dating back to works by [Darmois \(1935\)](#), [Koopman \(1936\)](#) and [Pitman \(1936\)](#). They have a number of natural properties, including: (1) The parameters  $\theta$  are uniquely determined by the expectation of the sufficient statistics  $\mathbb{E}_{p_\theta}[T]$ ; (2) The distribution  $p_\theta$  is the maximum entropy distribution, subject to having given values for  $\mathbb{E}_{p_\theta}[T]$ ; (3) They have conjugate priors ([Brown, 1986](#)), which allow characterizations of the family for the posterior of the parameters given data.

For any (odd positive integer) constant  $d$  and norm bound  $B \geq 1$ , we study a natural exponential family  $\mathcal{P}_{n,d,B}$  on  $\mathbb{R}^n$  where

1. The *sufficient statistics*  $T(x) \in \mathbb{R}^{M-1}$  consist of all monomials in  $x_1, \dots, x_n$  of degree at least 1 and at most  $d$  (where  $M = \binom{n+d}{d}$ ).
2. The *base measure* is defined as  $h(x) = \exp(-\sum_{i=1}^n x_i^{d+1})$ .<sup>1</sup>
3. The *parameters*  $\theta$  lie in an  $l_\infty$ -ball:  $\theta \in \Theta_B = \{\theta \in \mathbb{R}^{M-1} : \|\theta\|_\infty \leq B\}$ .

Towards stating our main results, we formally define the maximum likelihood and score matching objectives, denoting by  $\hat{\mathbb{E}}$  the empirical average over the training samples drawn from some  $p \in \mathcal{P}_{n,d,B}$ :

$$\begin{aligned} L_{\text{MLE}}(\theta) &= \hat{\mathbb{E}}_{x \sim p}[\log p_\theta(x)] \\ L_{\text{SM}}(\theta) &= \frac{1}{2} \hat{\mathbb{E}}_{x \sim p}[\|\nabla \log p(x) - \nabla \log p_\theta(x)\|^2] + K_p \\ &= \hat{\mathbb{E}}_{x \sim p} \left[ \text{Tr} \nabla^2 \log p_\theta(x) + \frac{1}{2} \|\nabla \log p_\theta(x)\|^2 \right] \end{aligned} \quad (1)$$

where  $K_p$  is a constant depending only on  $p$  and (1) follows by integration by parts ([Hyvärinen, 2005](#)). In the special case of exponential families, (1) is a quadratic, and in fact the optimum can be written in closed form:

$$\arg \min_{\theta} L_{\text{SM}}(\theta) = -\hat{\mathbb{E}}_{x \sim p}[(JT)_x (JT)_x^T]^{-1} \hat{\mathbb{E}}_{x \sim p} \Delta T(x) \quad (2)$$

where  $(JT)_x : (M-1) \times n$  is the Jacobian of  $T$  at the point  $x$ ,  $\Delta f = \sum_i \partial_i^2 f$  is the Laplacian, applied coordinate wise to the vector-valued function  $f$ .

With this setting in place, we show the following intractability result.

<sup>1</sup>We note that the choice of base measure is for convenience in ensuring tail bounds necessary in our proof.

**Theorem 1.1** (Informal, computational lower bound). *Unless  $RP = NP$ , there is no  $\text{poly}(n, N)$ -time algorithm that evaluates  $L_{\text{MLE}}(\theta)$  and  $\nabla L_{\text{MLE}}(\theta)$  given  $\theta \in \Theta_B$  and arbitrary samples  $x_1, \dots, x_N \in \mathbb{R}^n$ , for  $d = 7$ ,  $B = \text{poly}(n)$ . Thus, optimizing the MLE loss using a zeroth-order or first-order method is computationally intractable.*

The main idea of the proof is to construct a polynomial  $F_C(x)$  which has roots exactly at the satisfying assignments of a given 3-SAT formula  $C$ . We then argue that  $\exp(-\gamma F_C(x))$ , for sufficiently large  $\gamma > 0$ , concentrates near the satisfying assignments. Finally, we show sampling from this distribution or approximating  $\log Z_\theta$  or  $\nabla_\theta \log Z_\theta$  (where  $\theta \in \mathbb{R}^{M-1}$  is the parameter vector corresponding to the polynomial  $-\gamma F_C(x)$ ) would enable efficiently finding a satisfying assignment.

Our next result shows that MLE, though computationally intractable to compute via implementing zeroth or first order oracles, has (asymptotic) sample complexity  $\text{poly}(n, B)$  (for constant  $d$ ).

**Theorem 1.2** (Informal, efficiency of MLE). *The MLE estimator  $\hat{\theta}_{\text{MLE}} = \arg \max_\theta L_{\text{MLE}}(\theta)$  has asymptotic sample complexity polynomial in  $n$ . That is, for all sufficiently large  $N$  it holds with probability at least 0.99 (over  $N$  samples drawn from  $p_{\theta^*}$ ) that:*

$$\|\hat{\theta}_{\text{MLE}} - \theta^*\|^2 \leq O\left(\frac{(nB)^{\text{poly}(d)}}{N}\right).$$

The main proof technique for this is an anticoncentration bound of low-degree polynomials, for distributions in our exponential family.

Lastly, we prove that score matching *also* has polynomial (asymptotic) statistical complexity.

**Theorem 1.3** (Informal, efficiency of SM). *The score matching estimator  $\hat{\theta}_{\text{SM}} = \arg \max_\theta L_{\text{SM}}(\theta)$  also has asymptotic sample complexity at most polynomial in  $n$ . That is, for all sufficiently large  $N$  it holds with probability at least 0.99 (over  $N$  samples drawn from  $p_{\theta^*}$ ) that:*

$$\|\hat{\theta}_{\text{SM}} - \theta^*\|^2 \leq O\left(\frac{(nB)^{\text{poly}(d)}}{N}\right). \quad (3)$$

The main ingredient in this result is a bound on the *restricted Poincaré constant*—namely, the Poincaré constant, when restricted to functions that are linear in the sufficient statistics  $T$ . We bound this quantity for the exponential family we consider in terms of the condition number of the Fisher matrix of the distribution, which we believe is a result of independent interest. With this tool in hand, we can use the framework of [Koehler et al. \(2022\)](#), which relates the asymptotic sample complexity of score matching to the asymptotic sample complexity of maximum likelihood, in terms of the restricted Poincaré constant of the distribution.

## 1.1 Discussion and related work

**Score matching:** Score matching was proposed by [Hyvärinen \(2005\)](#), who also gave conditions under which it is consistent and asymptotically normal. Asymptotic normality is also proven for various kernelized variants of score matching in [Barp et al. \(2019\)](#). [Koehler et al. \(2022\)](#) prove that the statistical sample complexity of score matching is not much worse than the sample complexity of maximum likelihood when the distribution satisfies a (restricted) Poincaré inequality. While we leverage machinery from [Koehler et al. \(2022\)](#), their work only bounds the sample complexity of score matching by a quantity polynomial in the ambient dimension for a specific distribution in a specific bimodal exponential family. By contrast, we can handle an entire class of exponential families with low-degree sufficient statistics.

**Poincaré vs Restricted Poincaré:** We note that while Poincaré inequalities are directly related to isoperimetry and mixing of Markov chains, sample efficiency of score matching only depends on the Poincaré inequality holding for a *restricted* class of functions, namely, functions linear in the sufficient statistics. Hence, hardness of sampling only implies sample complexity lower bounds in cases where the family is expressive enough—indeed, the key to exponential lower bounds for score matching in [Koehler et al. \(2022\)](#) is augmenting the sufficient statistics with a function defined by a bad cut. This gap means that we can hope to have good sample complexity for score matching even in cases where sampling is hard—which we take advantage of in this work.

**Learning exponential families:** Despite the fact that exponential families are both classical and ubiquitous, both in statistics and machine learning, there is relatively little understanding about the computational-statistical tradeoffs to learn them from data, that is, what sample complexity can be achieved with a computationally efficient algorithm. [Ren et al. \(2021\)](#) consider a version of the “interaction screening” estimator, a close relative of pseudolikelihood, but do not prove anything about the statistical complexity of this estimator. [Shah et al. \(2021\)](#) consider a related estimator, and analyze it under various low-rank and sparsity assumptions of reshaping of the sufficient statistics into a tensor. Unfortunately, these assumptions are somewhat involved, and it’s unclear if they are needed for designing computationally and statistically efficient algorithms.

**Discrete exponential families (Ising models):** Ising models have the form  $p_J(x) \propto \exp(\sum_{i \sim j} J_{ij} x_i x_j + \sum_i J_i x_i)$  where  $\sim$  denotes adjacency in some (unknown) graph, and  $J_{ij}, J_i$  denote the corresponding pairwise and singleton potentials. [Bresler \(2015\)](#) gave an efficient algorithm for learning any Ising model over a graph with constant degree (and  $l_\infty$ -bounds on the coefficients); see also the more recent work ([Dagan et al., 2021](#)). In contrast, it is a classic result ([Arora and Barak, 2009](#)) that approximating the partition function of members in this family is NP-hard.

Similarly, the exponential family we consider is such that it contains members for which sampling and approximating their partition function is intractable (the main ingredient in the proof of Theorem 1.1). Nevertheless, by Theorem 3, we can learn the parameters for members in this family computationally efficiently, and with sample complexity comparable to the optimal one (achieved by maximum likelihood). This also parallels other developments in Ising models ([Bresler et al., 2014](#); [Montanari, 2015](#)), where it is known that restricting the type of learning algorithm (e.g., requiring it to work with sufficient statistics only) can make a tractable problem become intractable.

The parallels can be drawn even on an algorithmic level: a follow up work to [Bresler \(2015\)](#) by [Vuffray et al. \(2016\)](#) showed that similar results can be shown in the Ising model setting by using the “screening estimator”, a close relative of the classical pseudolikelihood estimator ([Besag, 1977](#)) which tries to learn a distribution by matching the conditional probability of singletons, and thereby avoids having to evaluate a partition function. Since conditional probabilities of singletons capture changes in a single coordinate, they can be viewed as a kind of “discrete gradient”—a further analogy to score matching in the continuous setting.<sup>2</sup>

## 2 Preliminaries

We consider the following exponential family. Fix positive integers  $n, d, B \in \mathbb{N}$  where  $d$  is odd. Let  $h(x) = \exp(-\sum_{i=1}^n x_i^{d+1})$ , and let  $T(x) \in \mathbb{R}^{M-1}$  be the vector of monomials in  $x_1, \dots, x_n$  of degree at least 1 and at most  $d$  (so that  $M = \binom{n+d}{d}$ ). Define  $\Theta \subseteq \mathbb{R}^{M-1}$  by  $\Theta = \{\theta \in \mathbb{R}^{M-1} : \|\theta\|_\infty \leq B\}$ . For any  $\theta \in \Theta$  define  $p_\theta : \mathbb{R}^n \rightarrow [0, \infty)$  by

$$p_\theta(x) := \frac{h(x) \exp(\langle \theta, T(x) \rangle)}{Z_\theta}$$

where  $Z_\theta = \int_{\mathbb{R}^n} h(x) \exp(\langle \theta, T(x) \rangle) dx$  is the normalizing constant. Then we consider the family  $\mathcal{P}_{n,d,B} := (p_\theta)_{\theta \in \Theta_B}$ . Throughout, we will assume that  $B \geq 1$ .

**Polynomial notation:** Let  $\mathbb{R}[x_1, \dots, x_n]_{\leq d}$  denote the space of polynomials in  $x_1, \dots, x_n$  of degree at most  $d$ . We can write any such polynomial  $f$  as  $f(x) = \sum_{|\mathbf{d}| \leq d} a_{\mathbf{d}} x_{\mathbf{d}}$  where  $\mathbf{d}$  denotes a degree function  $\mathbf{d} : [n] \rightarrow \mathbb{N}$ , and  $|\mathbf{d}| = \sum_{i=1}^n \mathbf{d}(i)$ , and we write  $x_{\mathbf{d}}$  to denote  $\prod_{i=1}^n x_i^{\mathbf{d}(i)}$ . Note that every  $\mathbf{d}$  with  $1 \leq |\mathbf{d}| \leq d$  corresponds to an index of  $T$ , i.e.  $T(x)_{\mathbf{d}} = x_{\mathbf{d}}$ .

Let  $\|\cdot\|_{\text{mon}}$  denote the  $\ell^2$  norm of a polynomial in the monomial basis; that is,  $\|\sum_{\mathbf{d}} a_{\mathbf{d}} x_{\mathbf{d}}\|_{\text{mon}} = (\sum_{\mathbf{d}} a_{\mathbf{d}}^2)^{1/2}$ . For any function  $f : \mathbb{R}^n \rightarrow \mathbb{R}$ , let  $\|f\|_{L^2([-1,1]^n)}^2 = \mathbb{E}_{x \sim \text{Unif}([-1,1]^n)} f(x)^2$ .

<sup>2</sup>In fact, ratio matching, proposed in [Hyvärinen \(2007\)](#) as a discrete analogue of score matching, relies on exactly this intuition.

160 **Statistical efficiency of MLE:** For any  $\theta \in \mathbb{R}^{M-1}$ , the Fisher information matrix of  $p_\theta$  with respect  
 161 to the sufficient statistics  $T(x)$  is defined as

$$\mathcal{I}(\theta) := \mathbb{E}_{x \sim p_\theta} [T(x)T(x)^\top] - \mathbb{E}_{x \sim p_\theta} [T(x)]\mathbb{E}_{x \sim p_\theta} [T(x)]^\top.$$

162 It is well-known that for any exponential family with no affine dependencies among the sufficient  
 163 statistics (see e.g., Theorem 4.6 in [Van der Vaart \(2000\)](#)), it holds that for any  $\theta^* \in \mathbb{R}^{M-1}$ , given  $N$   
 164 independent samples  $x^{(1)}, \dots, x^{(N)} \sim p_{\theta^*}$ , the estimator  $\hat{\theta}_{\text{MLE}} = \hat{\theta}_{\text{MLE}}(x^{(1)}, \dots, x^{(N)})$  satisfies

$$\sqrt{N}(\hat{\theta}_{\text{MLE}} - \theta^*) \rightarrow \mathcal{N}(0, \mathcal{I}(\theta^*)^{-1}).$$

165 **Statistical efficiency of score matching:** Our analysis of the statistical efficiency of score matching  
 166 is based on a result due to [Koehler et al. \(2022\)](#). We state a requisite definition followed by the result.

167 **Definition 2.1** (Restricted Poincaré for exponential families). The restricted Poincaré constant of  
 168  $p \in \mathcal{P}_{n,d,B}$  is the smallest  $C_P > 0$  such that for all  $w \in \mathbb{R}^{M-1}$ , it holds that

$$\text{Var}_p(\langle w, T(x) \rangle) \leq C_P \mathbb{E}_{x \sim p} \|\nabla_x \langle w, T(x) \rangle\|_2^2.$$

169 **Theorem 2.2** ([Koehler et al. \(2022\)](#)). Under certain regularity conditions (see Lemma B.4), for any  
 170  $p_{\theta^*}$  with restricted Poincaré constant  $C_P$  and with  $\lambda_{\min}(\mathcal{I}(\theta^*)) > 0$ , given  $N$  independent samples  
 171  $x^{(1)}, \dots, x^{(N)} \sim p_{\theta^*}$ , the estimator  $\hat{\theta}_{\text{SM}} = \hat{\theta}_{\text{SM}}(x^{(1)}, \dots, x^{(N)})$  satisfies

$$\sqrt{N}(\hat{\theta}_{\text{SM}} - \theta^*) \rightarrow \mathcal{N}(0, \Gamma)$$

172 where  $\Gamma$  satisfies

$$\|\Gamma\|_{\text{op}} \leq \frac{2C_P^2(\|\theta\|_2^2 \mathbb{E}_{x \sim p_{\theta^*}} \|(JT)(x)\|_{\text{op}}^4 + \mathbb{E}_{x \sim p_{\theta^*}} \|\Delta T(x)\|_2^2)}{\lambda_{\min}(\mathcal{I}(\theta^*))^2}$$

173 where  $(JT)(x)_i = \nabla_x T_i(x)$  and  $\Delta T(x) = \text{Tr} \nabla_x^2 T(x)$ .

### 174 3 Hardness of Implementing Optimization Oracles for $\mathcal{P}_{n,7,\text{poly}(n)}$

175 In this section we prove NP-hardness of implementing approximate zeroth-order and first-order opti-  
 176 mization oracles for maximum likelihood in the exponential family  $\mathcal{P}_{n,7,Cn^2 \log(n)}$  (for a sufficiently  
 177 large constant  $C$ ) as defined in Section 2; we also show that approximate sampling from this family  
 178 is NP-hard. See Theorems 3.4, 3.5, and A.5 respectively. All of the hardness results proceed by  
 179 reduction from 3-SAT and use the same construction.

180 The idea is that for any formula  $\mathcal{C}$  on  $n$  variables, we can construct a non-negative polynomial  $F_{\mathcal{C}}$   
 181 of degree at most 6 in variables  $x_1, \dots, x_n$ , which has roots exactly at the points of the hypercube  
 182  $\mathcal{H} := \{-1, 1\}^n \subseteq \mathbb{R}^n$  that correspond to satisfying assignments (under the bijection that  $x_i = 1$   
 183 corresponds to True and  $x_i = -1$  corresponds to False). Intuitively, the distribution with density  
 184 proportional to  $\exp(-\gamma F_{\mathcal{C}}(x))$  will, for sufficiently large  $\gamma > 0$ , concentrate on the satisfying  
 185 assignments. It is then straightforward to see that sampling from this distribution or efficiently  
 186 computing either  $\log Z_\theta$  or  $\nabla_\theta \log Z_\theta$  (where  $\theta \in \mathbb{R}^{M-1}$  is the parameter vector corresponding to  
 187 the polynomial  $-\gamma F_{\mathcal{C}}(x)$ ) would enable efficiently finding a satisfying assignment.

188 The remainder of this section makes the above intuition precise; important details include (1)  
 189 incorporating the base measure  $h(x) = \exp(-\sum_{i=1}^n x_i^8)$  into the density function, and (2) showing  
 190 that a polynomially-large temperature  $\gamma$  suffices.

191 **Definition 3.1** (Clause/formula polynomials). Given a 3-clause formula of the form  $C = \tilde{x}_i \vee \tilde{x}_j \vee \tilde{x}_k$   
 192 where  $\tilde{x}_i = x_i$  or  $\tilde{x}_i = \neg x_i$ , we construct a polynomial  $H_C \in \mathbb{R}[x_1, \dots, x_n]_{\leq 6}$  defined by

$$H_C(x) = f_i(x_i)^2 f_j(x_j)^2 f_k(x_k)^2$$

193 where

$$f_i(t) = \begin{cases} (t+1) & \text{if } x_i \text{ is negated in } C \\ (t-1) & \text{otherwise} \end{cases}.$$

194 For example, if  $C = x_1 \vee x_2 \vee \neg x_3$ , then  $H_C = (x_1 - 1)^2 (x_2 - 1)^2 (x_3 + 1)^2$ . Further, given a  
 195 3-SAT formula  $\mathcal{C} = C_1 \wedge \dots \wedge C_m$  on  $m$  clauses<sup>3</sup>, we define the polynomial

$$H_{\mathcal{C}}(x) = H_{C_1}(x) + \dots + H_{C_m}(x).$$

<sup>3</sup>It suffices to work with  $m = O(n)$ , see Theorem A.1.

196 It can be seen that any  $x \in \mathcal{H}$  corresponds to a satisfying assignment for  $\mathcal{C}$  if and only if  $H_{\mathcal{C}}(x) = 0$ .  
 197 Note that there are possibly points outside  $\mathcal{H}$  which satisfy  $H_{\mathcal{C}}(x) = 0$ . To avoid these solutions, we  
 198 introduce another polynomial:

199 **Definition 3.2** (Hypercube polynomial). We define  $G : \mathbb{R}^n \rightarrow \mathbb{R}$  by  $G(x) = \sum_{i=1}^n (1 - x_i^2)^2$ .

200 Note that  $G(x) \geq 0$  for all  $x$ , and the roots of  $G(x)$  are precisely the vertices of  $\mathcal{H}$ . Therefore for any  
 201  $\alpha, \beta > 0$ , the roots (in  $\mathbb{R}^n$ ) of the polynomial  $F_{\mathcal{C}}(x) = \alpha H_{\mathcal{C}}(x) + \beta G(x)$  are precisely the vertices  
 202 of  $\mathcal{H}$  that correspond to satisfying assignments for  $\mathcal{C}$ .

203 **Definition 3.3.** Let  $\mathcal{C}$  be a 3-CNF formula with  $n$  variables and  $m$  clauses. Let  $\alpha, \beta > 0$ . Then we  
 204 define a distribution  $P_{\mathcal{C}, \alpha, \beta}$  with density function

$$p_{\mathcal{C}, \alpha, \beta}(x) := \frac{h(x) \exp(-\alpha H_{\mathcal{C}}(x) - \beta G(x))}{Z_{\mathcal{C}, \alpha, \beta}}$$

205 where  $Z_{\mathcal{C}, \alpha, \beta} = \int_{\mathbb{R}^n} h(x) \exp(-\alpha H_{\mathcal{C}}(x) - \beta G(x)) dx$ .

206 This distribution lies in the exponential family  $\mathcal{P}_{n, d, B}$ , for  $d = 7$  and  $B = \Omega(\beta + m\alpha)$  (Lemma A.2).  
 207 Thus, if  $\theta(\mathcal{C}, \alpha, \beta)$  is the parameter vector that induces  $P_{\mathcal{C}, \alpha, \beta}$ , then it suffices to show that (a)  
 208 approximating  $\log Z_{\theta(\mathcal{C}, \alpha, \beta)}$ , (b) approximating  $\nabla_{\theta} \log Z_{\theta(\mathcal{C}, \alpha, \beta)}$ , and (c) sampling from  $P_{\mathcal{C}, \alpha, \beta}$  are  
 209 NP-hard (under randomized reductions). We sketch the proofs below; details are in Appendix A.

210 **Hardness of approximating  $\log Z_{\mathcal{C}, \alpha, \beta}$ :** In order to prove (a), we bound the mass of  $P_{\mathcal{C}, \alpha, \beta}$  in  
 211 each orthant of  $\mathbb{R}^n$ . In particular, we show that for  $\alpha = \Omega(n)$  and  $\beta = \Omega(m \log m)$ , any orthant  
 212 corresponding to a satisfying assignment has exponentially larger contribution to  $Z_{\mathcal{C}, \alpha, \beta}$  than any  
 213 orthant corresponding to an unsatisfying assignment. A consequence is that the partition function  
 214  $Z_{\mathcal{C}, \alpha, \beta}$  is exponentially larger when the formula  $\mathcal{C}$  is satisfiable than when it isn't (Lemma A.6). But  
 215 then approximating  $Z_{\mathcal{C}, \alpha, \beta}$  allows distinguishing a satisfiable formula from an unsatisfiable formula,  
 216 which is NP-hard. This implies the following theorem (proof in Section A.2):

217 **Theorem 3.4.** Fix  $n \in \mathbb{N}$  and let  $B \geq Cn^2$  for a sufficiently large constant  $C$ . Unless  $RP = NP$ ,  
 218 there is no  $\text{poly}(n)$ -time algorithm which takes as input an arbitrary  $\theta \in \Theta_B$  and outputs an  
 219 approximation of  $\log Z_{\theta}$  with additive error less than  $n \log 1.16$ .

220 **Hardness of approximating  $\nabla_{\theta} \log Z_{\theta(\mathcal{C}, \alpha, \beta)}$ :** Note that  $\nabla_{\theta} \log Z_{\theta} = \mathbb{E}_{x \sim p_{\theta}}[T(x)]$ , so in par-  
 221 ticular approximating the gradient yields an approximation to the mean  $\mathbb{E}_{x \sim p_{\theta}}[x]$ . Since  $P_{\mathcal{C}, \alpha, \beta}$  is  
 222 concentrated in orthants corresponding to satisfying assignments of  $\mathcal{C}$ , we would intuitively expect  
 223 that if  $\mathcal{C}$  has exactly one satisfying assignment  $v^*$ , then  $\text{sign}(\mathbb{E}_{p_{\theta}}[x])$  corresponds to this assignment.  
 224 Formally, we show that if  $\alpha = \Theta(n)$  and  $\beta = \Omega(mn \log m)$ , then  $\mathbb{E}_{x \sim P_{\mathcal{C}, \alpha, \beta}}[v_i^* x_i] \geq 1/20$  for all  
 225  $i \in [n]$  (Lemma A.7). Since solving a formula with a unique satisfying assignment is still NP-hard,  
 226 we get the following theorem (proof in Section A.3):

227 **Theorem 3.5.** Fix  $n \in \mathbb{N}$  and let  $B \geq Cn^2 \log(n)$  for a sufficiently large constant  $C$ . Unless  
 228  $RP = NP$ , there is no  $\text{poly}(n)$ -time algorithm which takes as input an arbitrary  $\theta \in \Theta_B$  and outputs  
 229 an approximation of  $\nabla_{\theta} \log Z_{\theta}$  with additive error (in an  $l_{\infty}$  sense) less than  $1/20$ .

230 With the above two theorems in hand, we are ready to present the formal version of Theorem 1.1; the  
 231 proof is immediate from the definition of  $L_{\text{MLE}}(\theta)$  (see Section A.5).

232 **Corollary 3.6.** Fix  $n, N \in \mathbb{N}$  and let  $B \geq Cn^2 \log n$  for a sufficiently large constant  $C$ . Unless  
 233  $RP = NP$ , there is no  $\text{poly}(n, N)$ -time algorithm which takes as input an arbitrary  $\theta \in \Theta_B$ , and an  
 234 arbitrary sample  $x_1, \dots, x_N \in \mathbb{R}^n$ , and outputs an approximation of  $L_{\text{MLE}}(\theta)$  up to additive error  
 235 of  $n \log 1.16$ , or  $\nabla_{\theta} L_{\text{MLE}}(\theta)$  up to an additive error of  $1/20$ .

236 **Hardness of approximate sampling:** We show that for  $\alpha = \Omega(n)$  and  $\beta = \Omega(m \log m)$ , the  
 237 likelihood that  $x \sim P_{\mathcal{C}, \alpha, \beta}$  lies in an orthant corresponding to a satisfying assignment for  $\mathcal{C}$  is at least  
 238  $1/2$  (Lemma A.4). Hardness of approximate sampling follows immediately (Theorem A.5). Hence,  
 239 although we show that score matching can efficiently estimate  $\theta^*$  from samples produced by nature,  
 240 knowing  $\theta^*$  isn't enough to efficiently generate samples from the distribution.

## 4 Statistical Efficiency of Maximum Likelihood

In this section we prove Theorem 1.2 by showing that for any  $\theta \in \Theta_B$ , we can lower bound the smallest eigenvalue of the Fisher information matrix  $\mathcal{I}(\theta)$ . Concretely, we show:

**Theorem 4.1.** *For any  $\theta \in \Theta_B$ , it holds that*

$$\lambda_{\min}(\mathcal{I}(\theta)) \geq (nB)^{-O(d^3)}.$$

As a corollary, given  $N$  samples from  $p_\theta$ , it holds as  $N \rightarrow \infty$  that  $\sqrt{N}(\hat{\theta}_{\text{MLE}} - \theta) \rightarrow N(0, \Gamma_{\text{MLE}})$  where  $\|\Gamma_{\text{MLE}}\|_{\text{op}} \leq (nB)^{O(d^3)}$ . Moreover, for sufficiently large  $N$ , with probability at least 0.99 it holds that  $\left\|\hat{\theta}_{\text{MLE}} - \theta\right\|_2^2 \leq (nB)^{O(d^3)}/N$ .

Once we have the bound on  $\lambda_{\min}(\mathcal{I}(\theta))$ , the first corollary follows from standard bounds for MLE (Section 2), and the second corollary follows from Markov's inequality (see e.g., Remark 4 in Koehler et al. (2022)). Lower-bounding  $\lambda_{\min}(\mathcal{I}(\theta))$  itself requires lower-bounding the variance of any polynomial (with respect to  $p_\theta$ ) in terms of its coefficients. The proof consists of three parts. First, we show that the norm of a polynomial in the monomial basis is upper-bounded in terms of its  $L^2$  norm on  $[-1, 1]^n$ :

**Lemma 4.2.** *For  $f \in \mathbb{R}[x_1, \dots, x_n]_{\leq d}$ , we have  $\|f\|_{\text{mon}}^2 \leq \binom{n+d}{d}(4e)^d \|f\|_{L^2([-1, 1]^n)}^2$ .*

The key idea behind this proof is to work with the basis of (tensorized) Legendre polynomials, which is orthonormal with respect to the  $L^2$  norm. Once we write the polynomial with respect to this basis, the  $L^2$  norm equals the Euclidean norm of the coefficients. Given this observation, all that remains is to bound the coefficients after the change-of-basis. The complete proof is deferred to Appendix C.

Next, we show that if a polynomial  $f : \mathbb{R}^n \rightarrow \mathbb{R}$  has small variance with respect to  $p$ , then there is some box on which  $f$  has small variance with respect to the uniform distribution. This provides a way of comparing the variance of  $f$  with its  $L^2$  norm (after an appropriate rescaling).

**Lemma 4.3.** *Fix any  $\theta \in \Theta_B$  and define  $p := p_\theta$ . Define  $R := 2^{d+3}nBM$ . Then for any  $f \in \mathbb{R}[x_1, \dots, x_n]_{\leq d}$ , there is some  $z \in \mathbb{R}^n$  with  $\|z\|_\infty \leq R$  and some  $\epsilon \geq 1/(2(d+1)MR^d(n+B))$  such that*

$$\text{Var}_p(f) \geq \frac{1}{2e} \text{Var}_{\tilde{\mathcal{U}}}(f),$$

where  $\tilde{\mathcal{U}}$  is the uniform distribution on  $\{x \in \mathbb{R}^n : \|x - z\|_\infty \leq \epsilon\}$ .

In order to prove this result, we pick a random box of radius  $\epsilon$  (within a large bounding box of radius  $R$ ). In expectation, the variance on this box (with respect to  $p$ ) is not much less than  $\text{Var}_p(f)$ . Moreover, for sufficiently small  $\epsilon$ , the density function of  $p$  on this box has bounded fluctuations, allowing comparison of  $\text{Var}_p(f)$  and  $\text{Var}_{\tilde{\mathcal{U}}}(f)$ . This argument is formalized in Appendix C.

Together, Lemma 4.2 and 4.3 allow us to lower bound the variance  $\text{Var}_p(f)$  in terms of  $\|f\|_{\text{mon}}$ .

**Lemma 4.4.** *Fix any  $\theta \in \Theta_B$  and define  $p := p_\theta$ . Define  $R := 2^{d+3}nBM$ . Then for any  $f \in \mathbb{R}[x_1, \dots, x_n]_{\leq d}$  with  $f(0) = 0$ , it holds that*

$$\text{Var}_p(f) \geq \frac{1}{2^{2d}(d+1)^{2d}(4e)^{d+1}M^{2d+3}R^{2d^2+2d}(n+B)^{2d}} \|f\|_{\text{mon}}^2.$$

See Appendix C for the proof. We are now ready to finish the proof of Theorem 4.1.

**Proof of Theorem 4.1.** Fix  $\theta \in \Theta_B$ . Pick any  $w \in \mathbb{R}^M$  and define  $f(x) = \langle w, T(x) \rangle$ . By definition of  $\mathcal{I}(\theta)$ , we have  $\text{Var}_{p_\theta}(f) = w^\top \mathcal{I}(\theta) w$ . Moreover,  $\|f\|_{\text{mon}}^2 = \|w\|_2^2$ . Thus, Lemma 4.4 gives us that  $w^\top \mathcal{I}(\theta) w \geq (nB)^{-O(d^3)} \|w\|_2^2$ , using that  $R = 2^{d+3}nBM$  and  $M = \binom{n+d}{d}$ . The bound  $\lambda_{\min}(\mathcal{I}(\theta)) \geq (nB)^{-O(d^3)}$  follows.  $\square$

## 5 Statistical Efficiency of Score Matching

In this section we prove Theorem 1.3. The main technical ingredient is a bound on the restricted Poincaré constants of distributions in  $\mathcal{P}_{n,d,B}$ . For any fixed  $\theta \in \Theta_B$ , we show that  $C_P$  can be bounded in terms of the *condition number* of the Fisher information matrix  $\mathcal{I}(\theta)$ . We describe the building blocks of the proof below.

Fix  $\theta, w \in \mathbb{R}^{M-1}$  and define  $f(x) := \langle w, T(x) \rangle$ . First, we need to upper bound  $\text{Var}_{p_\theta}(f)$ . This is where (the first half of) the condition number appears. Using the crucial fact that the restricted Poincaré constant only considers functions  $f$  that are linear in the sufficient statistics, and the definition of  $\mathcal{I}(\theta)$ , we get the following bound on  $\text{Var}_{p_\theta}(f)$  in terms of the coefficient vector  $w$  (proof in Section D):

**Lemma 5.1.** Fix  $\theta, w \in \mathbb{R}^{M-1}$  and define  $f(x) := \langle w, T(x) \rangle$ . Then

$$\|w\|_2^2 \lambda_{\min}(\mathcal{I}(\theta)) \leq \text{Var}_{p_\theta}(f) \leq \|w\|_2^2 \lambda_{\max}(\mathcal{I}(\theta)).$$

Next, we lower bound  $\mathbb{E}_{x \sim p_\theta} \|\nabla_x f(x)\|_2^2$ . To do so, we could pick an orthonormal basis and bound  $\mathbb{E} \langle u, \nabla_x f(x) \rangle^2$  over all directions  $u$  in the basis; however, it is unclear how to choose this basis. Instead, we pick  $u \sim \mathcal{N}(0, I_n)$  randomly, and use the following identity:

$$\mathbb{E}_{x \sim p_\theta} [\|\nabla_x f(x)\|_2^2] = \mathbb{E}_{x \sim p_\theta} \mathbb{E}_{u \sim N(0, I_n)} \langle u, \nabla_x f(x) \rangle^2$$

For any fixed  $u$ , the function  $g(x) = \langle u, \nabla_x f(x) \rangle$  is also a polynomial. If this polynomial had no constant coefficient, we could immediately lower bound  $\mathbb{E} \langle u, \nabla_x f(x) \rangle^2$  in terms of the remaining coefficients, as above. Of course, it may have a nonzero constant coefficient, but with some case-work over the value of the constant, we can still prove the following bound:

**Lemma 5.2.** Fix  $\theta, \tilde{w} \in \mathbb{R}^{M-1}$  and  $c \in \mathbb{R}$ , and define  $g(x) := \langle \tilde{w}, T(x) \rangle + c$ . Then

$$\mathbb{E}_{x \sim p_\theta} [g(x)^2] \geq \frac{c^2 + \|\tilde{w}\|_2^2}{4 + 4 \|\mathbb{E}[T(x)]\|_2^2} \min(1, \lambda_{\min}(\mathcal{I}(\theta))).$$

*Proof.* We have

$$\begin{aligned} \mathbb{E}_{x \sim p_\theta} [g(x)^2] &= \text{Var}_{p_\theta}(g) + \mathbb{E}_{x \sim p_\theta} [g(x)]^2 \\ &= \text{Var}_{p_\theta}(g - c) + (c + \tilde{w}^\top \mathbb{E}_{x \sim p_\theta} [T(x)])^2 \\ &\geq \|\tilde{w}\|_2^2 \lambda_{\min}(\mathcal{I}(\theta)) + (c + \tilde{w}^\top \mathbb{E}_{x \sim p_\theta} [T(x)])^2 \end{aligned}$$

where the inequality is by Lemma 5.1. We now distinguish two cases.

**Case I.** Suppose that  $|c + \tilde{w}^\top \mathbb{E}_{x \sim p_\theta} [T(x)]| \geq c/2$ . Then

$$\mathbb{E}_{x \sim p_\theta} [g(x)^2] \geq \|\tilde{w}\|_2^2 \lambda_{\min}(\mathcal{I}(\theta)) + \frac{c^2}{4} \geq \frac{c^2 + \|\tilde{w}\|_2^2}{4} \min(1, \lambda_{\min}(\mathcal{I}(\theta))).$$

**Case II.** Otherwise, we have  $|c + \tilde{w}^\top \mathbb{E}_{x \sim p_\theta} [T(x)]| < c/2$ . By the triangle inequality, it follows that  $|\tilde{w}^\top \mathbb{E}_{x \sim p_\theta} [T(x)]| \geq c/2$ , so  $\|\tilde{w}\|_2 \geq c/(2 \|\mathbb{E}_{x \sim p_\theta} [T(x)]\|_2)$ . Therefore

$$c^2 + \|\tilde{w}\|_2^2 \leq (1 + 4 \|\mathbb{E}_{x \sim p_\theta} [T(x)]\|_2^2) \|\tilde{w}\|_2^2,$$

from which we get that

$$\mathbb{E}_{x \sim p_\theta} [g(x)^2] \geq \|\tilde{w}\|_2^2 \lambda_{\min}(\mathcal{I}(\theta)) \geq \frac{c^2 + \|\tilde{w}\|_2^2}{1 + 4 \|\mathbb{E}_{x \sim p_\theta} [T(x)]\|_2^2} \lambda_{\min}(\mathcal{I}(\theta))$$

as claimed.  $\square$

With Lemma 5.1 and Lemma 5.2 in hand (taking  $g(x) = \langle u, \nabla_x f(x) \rangle$  in the latter), all that remains is to relate the squared monomial norm of  $\langle u, \nabla_x f(x) \rangle$  (in expectation over  $u$ ) to the squared monomial norm of  $f$ . This crucially uses the choice  $u \sim N(0, I_n)$ . We put together the pieces in the following lemma, whose detailed proof is provided in Section D.

308 **Lemma 5.3.** Fix  $\theta, w \in \mathbb{R}^{M-1}$ . Define  $f(x) := \langle w, T(x) \rangle$ . Then

$$\text{Var}_{p_\theta}(f) \leq (4 + 4 \|\mathbb{E}_{x \sim p_\theta}[T(x)]\|_2^2) \frac{\lambda_{\max}(\mathcal{I}(\theta))}{\min(1, \lambda_{\min}(\mathcal{I}(\theta)))} \mathbb{E}_{x \sim p_\theta}[\|\nabla_x f(x)\|_2^2].$$

309 Finally, putting together Lemma 5.3, Theorem 4.1, that lower bounds  $\lambda_{\min}(\mathcal{I}(\theta))$ , and Corollary B.2,  
 310 that upper bounds  $\lambda_{\max}(\mathcal{I}(\theta))$  (a straightforward consequence of the distributions in  $\mathcal{P}_{n,d,B}$  having  
 311 bounded moments), we can prove the following formal version of Theorem 1.3:

312 **Theorem 5.4.** Fix  $n, d, B, N \in \mathbb{N}$ . Pick any  $\theta^* \in \Theta_B$  and let  $x^{(1)}, \dots, x^{(N)} \sim p_{\theta^*}$  be independent  
 313 samples. Then as  $N \rightarrow \infty$ , the score matching estimator  $\hat{\theta}_{\text{SM}} = \hat{\theta}_{\text{SM}}(x^{(1)}, \dots, x^{(N)})$  satisfies

$$\sqrt{N}(\hat{\theta}_{\text{SM}} - \theta^*) \rightarrow N(0, \Gamma)$$

314 where  $\|\Gamma\|_{\text{op}} \leq (nB)^{O(d^3)}$ . As a corollary, for all sufficiently large  $N$  it holds with probability at  
 315 least 0.99 that  $\|\hat{\theta}_{\text{SM}} - \theta^*\|_2^2 \leq (nB)^{O(d^3)}/N$ .

316 *Proof.* We apply Theorem 2.2. By Lemma B.4 and the fact that  $\lambda_{\min}(\mathcal{I}(\theta^*)) > 0$  (Theorem 4.1), the  
 317 necessary regularity conditions are satisfied so that the score matching estimator is consistent and  
 318 asymptotically normal, with asymptotic covariance  $\Gamma$  satisfying

$$\|\Gamma\|_{\text{op}} \leq \frac{2C_P^2(\|\theta\|_2^2 \mathbb{E}_{x \sim p_{\theta^*}} \|(JT)(x)\|_{\text{op}}^4 + \mathbb{E}_{x \sim p_{\theta^*}} \|\Delta T(x)\|_2^2)}{\lambda_{\min}(\mathcal{I}(\theta^*))^2} \quad (4)$$

319 where  $C_P$  is the restricted Poincaré constant for  $p_{\theta^*}$  with respect to linear functions in  $T(x)$  (see  
 320 Definition 2.1). By Lemma 5.3, we have

$$\begin{aligned} C_P &\leq (4 + 4 \|\mathbb{E}_{x \sim p_\theta}[T(x)]\|_2^2) \frac{\lambda_{\max}(\mathcal{I}(\theta^*))}{\min(1, \lambda_{\min}(\mathcal{I}(\theta^*)))} \\ &\leq (4 + 4B^{2d}M^{2d+2}2^{2d(d+1)+1}) \frac{B^{2d}M^{2d+1}2^{2d(d+1)+1}}{(nB)^{-O(d^3)}} \leq (nB)^{O(d^3)} \end{aligned}$$

321 using parts (a) and (b) of Corollary B.2; Theorem 4.1; and the fact that  $M = \binom{n+d}{d}$ . Substituting into  
 322 (4) and bounding the remaining terms using Lemma B.3 and a second application of Theorem 4.1,  
 323 we conclude that  $\|\Gamma\|_{\text{op}} \leq (nB)^{O(d^3)}$  as claimed. The high-probability bound now follows from  
 324 Markov's inequality; see Remark 4 in Koehler et al. (2022) for details.  $\square$

## 325 6 Conclusion

326 We have provided a concrete example of an exponential family—namely, exponentials of bounded  
 327 degree polynomials—where score matching is significantly more computationally efficient than  
 328 maximum likelihood estimation (through optimization with a zero- or first-order oracle), while still  
 329 achieving the same sample efficiency up to polynomial factors. While score matching was designed to  
 330 be more computationally efficient for exponential families, the determination of statistical complexity  
 331 is more challenging, and we give the first separation between these two methods for a general class  
 332 of functions.

333 As we have restricted our attention to the asymptotic behavior of both of the methods, an interesting  
 334 future direction is to see how the finite sample complexities differ. One could also give a more  
 335 fine-grained comparison between the polynomial dependencies of score matching and MLE, which  
 336 we have not attempted to optimize. Finally, it would be interesting to relate our results with similar  
 337 results and algorithms for learning Ising and higher-order spin glass models in the discrete setting,  
 338 and give a more unified treatment of pseudo-likelihood or score/ratio matching algorithms in these  
 339 different settings.

## References

- Arora, S. and Barak, B. (2009). *Computational complexity: a modern approach*. Cambridge University Press.
- Barp, A., Briol, F.-X., Duncan, A., Girolami, M., and Mackey, L. (2019). Minimum stein discrepancy estimators. *Advances in Neural Information Processing Systems*, 32.
- Besag, J. (1977). Efficiency of pseudolikelihood estimation for simple gaussian fields. *Biometrika*, pages 616–618.
- Bresler, G. (2015). Efficiently learning ising models on arbitrary graphs. In *Proceedings of the forty-seventh annual ACM symposium on Theory of computing*, pages 771–782.
- Bresler, G., Gamarnik, D., and Shah, D. (2014). Structure learning of antiferromagnetic ising models. *Advances in Neural Information Processing Systems*, 27.
- Brown, L. D. (1986). Fundamentals of statistical exponential families: with applications in statistical decision theory. Ims.
- Cook, S. A. (1971). The complexity of theorem-proving procedures. In *Proceedings of the third annual ACM symposium on Theory of computing*, pages 151–158.
- Dagan, Y., Daskalakis, C., Dikkala, N., and Kandiros, A. V. (2021). Learning ising models from one or multiple samples. In *Proceedings of the 53rd Annual ACM SIGACT Symposium on Theory of Computing*, pages 161–168.
- Darmois, G. (1935). Sur les lois de probabilit a estimation exhaustive. *CR Acad. Sci. Paris*, 260(1265):85.
- Forbes, P. G. and Lauritzen, S. (2015). Linear estimating equations for exponential families with application to gaussian linear concentration models. *Linear Algebra and its Applications*, 473:261–283.
- Hyv arinen, A. (2005). Estimation of non-normalized statistical models by score matching. *Journal of Machine Learning Research*, 6(4).
- Hyv arinen, A. (2007). Some extensions of score matching. *Computational statistics & data analysis*, 51(5):2499–2512.
- Koehler, F., Heckett, A., and Risteski, A. (2022). Statistical efficiency of score matching: The view from isoperimetry. *arXiv preprint arXiv:2210.00726*.
- Koepf, W. (1998). Hypergeometric summation. *Vieweg, Braunschweig/Wiesbaden*, 5(6).
- Koopman, B. O. (1936). On distributions admitting a sufficient statistic. *Transactions of the American Mathematical society*, 39(3):399–409.
- Montanari, A. (2015). Computational implications of reducing data to sufficient statistics.
- Pitman, E. J. G. (1936). Sufficient statistics and intrinsic accuracy. In *Mathematical Proceedings of the cambridge Philosophical society*, volume 32, pages 567–579. Cambridge University Press.
- Ren, C. X., Misra, S., Vuffray, M., and Lokhov, A. Y. (2021). Learning continuous exponential families beyond gaussian. *arXiv preprint arXiv:2102.09198*.
- Shah, A., Shah, D., and Wornell, G. (2021). A computationally efficient method for learning exponential family distributions. *Advances in neural information processing systems*, 34:15841–15854.
- Valiant, L. G. and Vazirani, V. V. (1985). Np is as easy as detecting unique solutions. In *Proceedings of the seventeenth annual ACM symposium on Theory of computing*, pages 458–463.
- Van der Vaart, A. W. (2000). *Asymptotic statistics*, volume 3. Cambridge university press.
- Vuffray, M., Misra, S., Lokhov, A., and Chertkov, M. (2016). Interaction screening: Efficient and sample-optimal learning of ising models. *Advances in neural information processing systems*, 29.

## 385 A Omitted Proofs from Section 3

386 **Theorem A.1** (Valiant and Vazirani (1985); Cook (1971)). Suppose that there is a randomized  
 387  $\text{poly}(n)$ -time algorithm for the following problem: given a 3-CNF formula  $\mathcal{C}$  with  $n$  variables and at  
 388 most  $5n$  clauses, under the promise that  $\mathcal{C}$  has at most one satisfying assignment, determine whether  
 389  $\mathcal{C}$  is satisfiable. Then,  $\text{NP} = \text{RP}$ .

390 **Lemma A.2.** In the setting of Definition 3.3, set  $d := 7$  and  $B := 64m\alpha + 2\beta$ . Then  $p_{\mathcal{C},\alpha,\beta} \in \mathcal{P}_{n,d,B}$ .

391 *Proof.* Since  $\alpha H_{\mathcal{C}}(x) + \beta G(x)$  is a polynomial in  $x_1, \dots, x_n$  of degree at most 7, there is some  
 392  $\theta = \theta(\mathcal{C}, \alpha, \beta) \in \mathbb{R}^{M-1}$  such that  $\langle \theta, T(x) \rangle + \alpha H_{\mathcal{C}}(x) + \beta G(x)$  is a constant independent of  $x$ . Then  
 393  $h(x) \exp(-\alpha H_{\mathcal{C}}(x) - \beta G(x))$  is proportional to  $h(x) \exp(\langle \theta, T(x) \rangle)$ , so  $p_{\mathcal{C},\alpha,\beta} = p_{\theta}$ . Moreover,  
 394 for any clause  $C_j$ , every monomial of  $H_{C_j}$  has coefficient at most 64 in absolute value, so every  
 395 monomial of  $H_{\mathcal{C}}$  has coefficient at most  $64m$ . Similarly, every monomial of  $G$  has coefficient at most  
 396 2 in absolute value. Thus,  $\|\theta\|_{\infty} \leq 64m\alpha + 2\beta =: B$ , so  $p_{\mathcal{C},\alpha,\beta} \in \mathcal{P}_{n,d,B}$ .  $\square$

397 Given a point  $v \in \mathcal{H}$ , let  $\mathcal{O}(v) := \{x \in \mathbb{R}^n : x_i v_i \geq 0; \forall i \in [n]\}$  denote the octant containing  $v$ , and  
 398 let  $\mathcal{B}_r(v) := \{x \in \mathbb{R}^n : \|x - v\|_{\infty} \leq r\}$  denote the ball of radius  $r$  with respect to  $\ell_{\infty}$  norm.

399 **Lemma A.3.** Let  $p := p_{\mathcal{C},\alpha,\beta}$  and  $Z := Z_{\mathcal{C},\alpha,\beta}$  for some 3-CNF  $\mathcal{C}$  with  $m$  clauses and  $n$  variables,  
 400 and some parameters  $\alpha, \beta > 0$ . Let  $r \in (0, 1)$ . If  $\beta \geq 40r^{-2} \log(4n/r)$ , then for any  $v \in \mathcal{H}$  that is  
 401 a satisfying assignment for  $\mathcal{C}$ ,

$$\Pr_{x \sim p}(x \in \mathcal{B}_r(v)) \geq \frac{e^{-1-81m\alpha r^2}}{Z} \left( \int_0^{\infty} \exp(-x^8 - \beta(1-x^2)^2) dx \right)^n.$$

402 For any  $w \in \mathcal{H}$  that is not a satisfying assignment for  $\mathcal{C}$ ,

$$\Pr_{x \sim p}(x \in \mathcal{O}(w)) \leq \frac{e^{-\alpha}}{Z} \left( \int_0^{\infty} \exp(-x^8 - \beta(1-x^2)^2) dx \right)^n.$$

403 *Proof.* We begin by lower bounding the probability over  $\mathcal{B}_r(v)$ . Pick any clause  $C_{\ell}$  included in  $\mathcal{C}$ .  
 404 We claim that  $H_{C_{\ell}}(v') \leq 81r^2$  for all  $v' \in \mathcal{B}_r(v)$ . Indeed, say that  $C_{\ell} = \tilde{x}_i \vee \tilde{x}_j \vee \tilde{x}_k$ . Since  $v$   
 405 satisfies  $C_{\ell}$ , at least one of  $\{f_i(v_i), f_j(v_j), f_k(v_k)\}$  must be zero. Without loss of generality, say that  
 406  $f_i(v_i) = 0$ ; also observe that  $|f_j(v_j)|, |f_k(v_k)| \leq 2$ . It follows that for any  $v' \in \mathcal{B}_r(v)$ ,  $|f_i(v'_i)| \leq r$   
 407 and  $|f_j(v'_j)|, |f_k(v'_k)| \leq 2 + r \leq 3$  (since  $r \leq 1$ ). Therefore, we have

$$H_{C_{\ell}}(v') \leq r^2 \cdot (3)^2 \cdot (3)^2 = 81r^2.$$

408 Summing over all  $m$  possible clauses, we have  $H_{\mathcal{C}}(v') \leq 81mr^2$  for all  $v' \in \mathcal{B}_r(v)$ . Hence,

$$\begin{aligned} \Pr_{x \sim p}(x \in \mathcal{B}_r(v)) &= \frac{1}{Z} \int_{\mathcal{B}_r(v)} \exp \left( - \sum_{i=1}^n x_i^8 - \alpha H_{\mathcal{C}}(x) - \beta G(x) \right) dx \\ &\geq \frac{e^{-81m\alpha r^2}}{Z} \int_{\mathcal{B}_r(v)} \exp \left( - \sum_{i=1}^n x_i^8 - \beta G(x) \right) dx \\ &= \frac{e^{-81m\alpha r^2}}{Z} \left( \int_{1-r}^{1+r} \exp(-x^8 - \beta(1-x^2)^2) dx \right)^n \\ &\geq \frac{e^{-81m\alpha r^2}}{Z} \left( 1 + \frac{1}{n} \right)^{-n} \left( \int_0^{\infty} \exp(-x^8 - \beta(1-x^2)^2) dx \right)^n \quad (5) \\ &\geq \frac{e^{-1-81m\alpha r^2}}{Z} \left( \int_0^{\infty} \exp(-x^8 - \beta(1-x^2)^2) dx \right)^n \end{aligned}$$

409 where the second inequality (5) is by Lemma A.8. Next, we upper bound the probability over  
 410  $\mathcal{O}(w)$ . Let  $C_{\ell}$  be any clause in  $\mathcal{C}$  that is not satisfied by  $w$ . Say that  $C_{\ell} = \tilde{x}_i \vee \tilde{x}_j \vee \tilde{x}_k$ .  
 411 Then  $|f_i(w_i)| = |f_j(w_j)| = |f_k(w_k)| = 2$ . Furthermore, for any  $w' \in \mathcal{O}^d(w)$ , we have

412  $|f_i(w'_i)|, |f_j(w'_j)|, |f_k(w'_k)| \geq 1$ , and hence  $H_{C_\ell}(w') \geq 1$ . Since  $H_{C'}(x) \geq 0$  for all  $x, C'$ , we  
 413 conclude that  $H_C(w') \geq H_{C_\ell}(w') \geq 1$  for all  $w' \in \mathcal{O}(w)$ . In particular, this gives us

$$\begin{aligned} \Pr_{x \sim p}(x \in \mathcal{O}(w)) &= \frac{1}{Z} \int_{\mathcal{O}(w)} \exp\left(-\sum_{i=1}^n x_i^8 - \alpha H_C(x) - \beta G(x)\right) dx \\ &\leq \frac{e^{-\alpha}}{Z} \int_{\mathcal{O}(w)} \exp\left(-\sum_{i=1}^n x_i^8 - \beta G(x)\right) dx \\ &= \frac{e^{-\alpha}}{Z} \left(\int_0^\infty \exp(-x^8 - \beta(1-x^2)^2) dx\right)^n \end{aligned}$$

414 as claimed.  $\square$

### 415 A.1 Hardness of approximate sampling

416 **Lemma A.4.** *Let  $\mathcal{C}$  be a satisfiable instance of 3-SAT with  $m$  clauses and  $n$  variables. Let  $\alpha, \beta > 0$   
 417 satisfy  $\alpha \geq 2(n+1)$  and  $\beta \geq 6480m \log(13n\sqrt{m})$ . Set  $p := p_{\mathcal{C}, \alpha, \beta}$  and  $Z := Z_{\mathcal{C}, \alpha, \beta}$ . If  $\mathcal{V} \subseteq \mathcal{H}$  is  
 418 the set of satisfiable assignments for  $\mathcal{C}$ , then*

$$\sum_{v \in \mathcal{V}} \Pr_{x \sim p}(x \in \mathcal{O}(v)) \geq \frac{1}{2}.$$

419 *Proof.* Let  $v \in \mathcal{H}$  be any assignment that satisfies  $\mathcal{C}$ , and let  $w \in \mathcal{H}$  be any assignment that does not  
 420 satisfy  $\mathcal{C}$ . By Lemma A.3 with  $r = 1/\sqrt{162m}$ , we have

$$\begin{aligned} \Pr_{x \sim p_{\mathcal{C}}}(x \in \mathcal{O}(v)) &\geq \Pr_{x \sim p_{\mathcal{C}}}(x \in B_r(v)) \\ &\geq \frac{e^{-1-\alpha/2}}{Z} \left(\int_0^\infty \exp(-x^8 - \beta(1-x^2)^2) dx\right)^n \\ &\geq e^{-1+\alpha/2} \Pr(x \in \mathcal{O}(w)). \end{aligned}$$

421 Since we chose  $\alpha$  sufficiently large that  $e^{-1+\alpha/2} \geq 2^n$ , we get that

$$\Pr_{x \sim p_{\mathcal{C}}}(x \in \mathcal{O}(v)) \geq \sum_{w \in \mathcal{H} \setminus \mathcal{V}} \Pr_{x \sim p_{\mathcal{C}}}(x \in \mathcal{O}(w)).$$

422 Hence,

$$\sum_{v \in \mathcal{V}} \Pr_{x \sim p_{\mathcal{C}}}(x \in \mathcal{O}(v)) \geq \sum_{w \in \mathcal{H} \setminus \mathcal{V}} \Pr_{x \sim p_{\mathcal{C}}}(x \in \mathcal{O}(w)) = 1 - \sum_{v \in \mathcal{V}} \Pr_{x \sim p_{\mathcal{C}}}(x \in \mathcal{O}(v)).$$

423 The lemma statement follows.  $\square$

424 **Theorem A.5.** *Let  $B \geq Cn^2$  for a sufficiently large constant  $C$ . Unless  $RP = NP$ , there is no  
 425 algorithm which takes as input an arbitrary  $\theta \in \Theta_B$  and outputs a sample from a distribution  $Q$  with  
 426  $\text{TV}(P_\theta, Q) \leq 1/3$  in  $\text{poly}(n)$  time.*

427 *Proof.* Suppose that such an algorithm exists. For each  $n \in \mathbb{N}$  define  $\alpha = 2(n+1)$  and  $\beta =$   
 428  $32400n \log(13n\sqrt{5n})$ . Given a 3-CNF formula  $\mathcal{C}$  with  $n$  variables and at most  $5n$  clauses, we can  
 429 compute  $\theta = \theta(\mathcal{C}, \alpha, \beta)$ . By Lemma A.2 we have  $\theta \in \Theta_B$  so long as  $B \geq Cn^2$  for a sufficiently  
 430 large constant  $C$ . Thus, by assumption we can generate a sample from a distribution  $Q$  with  
 431  $\text{TV}(P_{\mathcal{C}, \alpha, \beta}, Q) \leq 1/3$ . But by Lemma A.4, we have  $\Pr_{x \sim P_{\mathcal{C}, \alpha, \beta}}[\text{sign}(x) \text{ satisfies } \mathcal{C}] \geq 1/2$ . Thus,  
 432  $\Pr_{x \sim Q}[\text{sign}(x) \text{ satisfies } \mathcal{C}] \geq 1/6$ . It follows that we can find a satisfying assignment with  $O(1)$   
 433 invocations of the sampling algorithm in expectation. By Theorem A.1 we get  $NP = RP$ .  $\square$

## 434 A.2 Hardness of approximating zeroth-order oracle

435 **Lemma A.6.** Fix  $n, m \in \mathbb{N}$  and let  $\alpha \geq 2(n+1)$  and  $\beta \geq 6480m \log(13n\sqrt{m})$ . There is a constant  
 436  $A = A(n, m, \alpha, \beta)$  so that the following hold for every 3-CNF formula  $\mathcal{C}$  with  $n$  variables and  $m$   
 437 clauses:

- 438 • If  $\mathcal{C}$  is unsatisfiable, then  $Z_{\mathcal{C}, \alpha, \beta} \leq A$
- 439 • If  $\mathcal{C}$  is satisfiable, then  $Z_{\mathcal{C}, \alpha, \beta} \geq (2/e)^n A$ .

440 *Proof.* If  $\mathcal{C}$  is unsatisfiable, then by the second part of Lemma A.3, we have

$$Z = Z \sum_{w \in \mathcal{H}} \Pr_{x \sim p}(x \in \mathcal{O}(w)) \leq 2^n e^{-\alpha} \left( \int_0^1 \exp(-x^{d+1} - \beta(1-x^2)^2) dx \right)^n =: A_{\text{unsat}}.$$

441 On the other hand, if  $\mathcal{C}$  is satisfiable, then by the first part of Lemma A.3 with  $r = 1/\sqrt{162m}$ ,

$$Z \geq Z \Pr_{x \sim p}(x \in \mathcal{B}_r(v)) \geq e^{-1-\alpha/2} \left( \int_0^1 \exp(-x^{d+1} - \beta(1-x^2)^2) dx \right)^n =: A_{\text{sat}}.$$

442 Since  $\alpha \geq 2(n+1)$ , we get

$$A_{\text{unsat}} \leq (2/e)^n A_{\text{sat}}$$

443 as claimed.  $\square$

444 *Proof of Theorem 3.4.* First, observe that the following problem is NP-hard (under randomized  
 445 reductions): given two 3-CNF formulas  $\mathcal{C}, \mathcal{C}'$  each with  $n$  variables and at most  $10n$  clauses, where  
 446 it is promised that exactly one of the formulas is satisfiable, determine which of the formulas is  
 447 satisfiable. Indeed, this follows from Theorem A.1: given a 3-CNF formula  $\mathcal{C}$  with  $n$  variables, at  
 448 most  $5n$  clauses, and at most one satisfying assignment, consider adjoining either the clause  $x_i$  or the  
 449 clause  $\neg x_i$  to  $\mathcal{C}$ . If  $\mathcal{C}$  has a satisfying assignment  $v^*$ , then exactly one of the resulting formulas is  
 450 satisfiable, and determining which one is satisfiable identifies  $v_i^*$ . Repeating this procedure for all  
 451  $i \in [n]$  yields an assignment  $v$ , which satisfies  $\mathcal{C}$  if and only if  $\mathcal{C}$  is satisfiable.

452 For each  $n \in \mathbb{N}$  define  $\alpha = 2(n+1)$  and  $\beta = 64800n \log(13n\sqrt{10n})$ . Let  $B > 0$  be chosen later.  
 453 Suppose that there is a poly( $n$ )-time algorithm which, given  $\theta \in \Theta_B$ , computes an approximation of  
 454  $\log Z_\theta$  with additive error less than  $n \log 1.16$ . Then given two formulas  $\mathcal{C}$  and  $\mathcal{C}'$  with  $n$  variables  
 455 and at most  $10n$  clauses each, we can compute  $\theta = \theta(\mathcal{C}, \alpha, \beta)$  and  $\theta' = \theta(\mathcal{C}', \alpha, \beta)$ . By Lemma A.2,  
 456 we have  $\theta, \theta' \in \Theta_B$  so long as  $B \geq Cn^2$  for a sufficiently large constant  $C$ . Hence by assumption  
 457 we can compute approximations  $\tilde{Z}_\theta$  and  $\tilde{Z}_{\theta'}$  of  $Z_\theta$  and  $Z_{\theta'}$  respectively, with multiplicative error less  
 458 than  $1.16^n$ . However, by Lemma A.6 and the assumption that exactly one of  $\mathcal{C}$  and  $\mathcal{C}'$  is satisfiable,  
 459 we know that  $\tilde{Z}_\theta > \tilde{Z}_{\theta'}$  if and only if  $\mathcal{C}$  is satisfiable. Thus, NP = RP.  $\square$

## 460 A.3 Hardness of approximating first-order oracle

461 **Lemma A.7.** Let  $\mathcal{C}$  be a 3-CNF formula with  $m$  clauses and  $n$  variables, and exactly one satisfying  
 462 assignment  $v^* \in \mathcal{H}$ . Let  $\alpha = 4n$  and  $\beta \geq 25920mn \log(102n\sqrt{mn})$ , and define  $p := p_{\mathcal{C}, \alpha, \beta}$  and  
 463  $Z := Z_{\mathcal{C}, \alpha, \beta}$ . Then  $\mathbb{E}_{x \sim p}[v_i^* x_i] \geq 1/20$  for all  $i \in [n]$ .

464 *Proof.* Without loss of generality take  $i = 1$  and  $v_1^* = 1$ . Set  $r = 1/(\sqrt{648mn})$ ,  $\alpha = 4n$ , and  
 465  $\beta \geq 40r^{-2} \log(4n/r)$ . We want to show that  $\mathbb{E}_{x \sim p}[x_1] \geq 1/20$ . We can write

$$\begin{aligned} \mathbb{E}[x_1] &= \mathbb{E}[x_1 \mathbb{1}[x \in B_r(v^*)]] + \mathbb{E}[x_1 \mathbb{1}[x \in \mathcal{O}(v^*) \setminus B_r(v^*)]] + \sum_{v \in \mathcal{H} \setminus \{v^*\}} \mathbb{E}[x_1 \mathbb{1}[x \in \mathcal{O}(v)]] \\ &\geq (1-r) \Pr[x \in B_r(v^*)] - 2^n \max_{v \in \mathcal{H} \setminus \{v^*\}} \mathbb{E}[|x_1| \mathbb{1}[x \in \mathcal{O}(v)]] \end{aligned} \quad (6)$$

466 since  $x_1 \geq 1-r$  for  $x \in B_r(v^*)$  and  $x_1 \geq 0$  for  $x \in \mathcal{O}(v^*)$ . Now observe that on the one hand,

$$\Pr(x \in B_r(v^*)) \geq \frac{e^{-1-81m\alpha r^2}}{Z} \left( \int_0^1 \exp(-x^* - \beta g(x)) dx \right)^n \quad (7)$$

467 by Lemma A.3. On the other hand, for any  $v \in \mathcal{H} \setminus \{v^*\}$ ,

$$\begin{aligned}
\mathbb{E}[|x_1| \mathbb{1}[x \in \mathcal{O}(v)]] &= \frac{1}{Z} \int_{\mathcal{O}(v)} |x_1| \exp \left( - \sum_{i=1}^n x_i^8 - \alpha H(x) - \beta G(x) \right) dx \\
&\leq \frac{e^{-\alpha}}{Z} \int_{\mathcal{O}(v)} |x_1| \exp \left( - \sum_{i=1}^n x_i^8 - \beta G(x) \right) dx \\
&= \frac{e^{-\alpha}}{Z} \left( \int_0^\infty x \exp(-x^8 - \beta g(x)) dx \right) \left( \int_0^\infty \exp(-x^8 - \beta g(x)) dx \right)^{n-1} \\
&\leq \frac{2e^{-\alpha}}{Z} \left( \int_0^\infty \exp(-x^8 - \beta g(x)) dx \right)^n \tag{8}
\end{aligned}$$

468 where the second inequality is by Lemma A.9 with  $k = 1$ . Combining (7) and (8) with (6), we have

$$\begin{aligned}
\mathbb{E}[x_1] &\geq \frac{(1-r)e^{-1-81m\alpha r^2} - 2^{n+1}e^{-\alpha}}{Z} \left( \int_0^\infty \exp(-x^8 - \beta g(x)) dx \right)^n \\
&\geq \frac{1}{10Z} \left( \int_0^\infty \exp(-x^8 - \beta g(x)) dx \right)^n \\
&\geq \frac{1}{10Z} \int_{\mathcal{O}(v^*)} \exp \left( - \sum_{i=1}^n x_i^8 - \alpha H(x) - \beta G(x) \right) dx \\
&= \frac{1}{10} \Pr[x \in \mathcal{O}(v^*)] \\
&\geq \frac{1}{20}
\end{aligned}$$

469 where the second inequality is by choice of  $\alpha$  and  $r$ ; the third inequality is by nonnegativity of  $H(x)$ ;  
470 and the fourth inequality is by Lemma A.4 and uniqueness of the satisfying assignment  $v^*$ .  $\square$

471 *Proof of Theorem 3.5.* Suppose that such an algorithm exists. Set  $\alpha = 4n$  and  $\beta =$   
472  $129600n^2 \log(102n^2\sqrt{5})$ . Given a 3-CNF formula  $\mathcal{C}$  with  $n$  variables, at most  $5n$  clauses, and  
473 exactly one satisfying assignment  $v^* \in \mathcal{H}$ , we can compute  $\theta = \theta(\mathcal{C}, \alpha, \beta)$ . Let  $E \in \mathbb{R}^n$  be the  
474 algorithm's estimate of  $\nabla_\theta \log Z_\theta = \mathbb{E}_{x \sim p_{\mathcal{C}, \alpha, \beta}} T(x)$ . Then  $\|E - \mathbb{E}_{x \sim p_{\mathcal{C}, \alpha, \beta}} T(x)\|_\infty < 1/20$ . But  
475 by Lemma A.7, for each  $i \in [n]$ , the  $i$ -th entry of  $\mathbb{E}_{x \sim p_{\mathcal{C}, \alpha, \beta}} T(x)$ , which corresponds to the monomial  
476  $x_i$ , has sign  $v_i^*$  and magnitude at least  $1/20$ . Thus,  $\text{sign}(E_i) = v_i^*$ . So we can compute  $v^*$  in  
477 polynomial time. By Theorem A.1, it follows that  $\text{NP} = \text{RP}$ .  $\square$

#### 478 A.4 Integral bounds

479 **Lemma A.8.** Fix  $\beta > 150$  and  $\gamma \in [0, 1]$ . Define  $f : \mathbb{R} \rightarrow \mathbb{R}$  by  $f(x) = \gamma x^8 + \beta(1 - x^2)^2$ . Pick  
480 any  $r \in (6/\beta, 0.04)$ . Then

$$\int_0^\infty \exp(-f(x)) dx \leq \left( \frac{1}{1 - \exp(-\beta r^2/8)} + \frac{2 \exp(-\beta r/40)}{r} \right) \int_{1-r}^{1+r} \exp(-f(x)) dx.$$

481 In particular, for any  $m \in \mathbb{N}$ , if  $\beta \geq 40r^{-2} \log(4m/r)$ , then

$$\int_0^\infty \exp(-f(x)) dx \leq \left( 1 + \frac{1}{m} \right) \int_{1-r}^{1+r} \exp(-f(x)) dx.$$

482 *Proof.* Set  $a = 1/\sqrt{2}$ . For any  $x \in [a, \infty)$  we have  $f''(x) = 56\gamma x^6 - 2\beta + 6\beta x^2 \geq \beta > 0$   
483 for  $\beta > 150$ . Thus,  $f$  has at most one critical point in  $[a, \infty)$ ; call this point  $t_0$ . Since  $f'(x) =$   
484  $8\gamma x^7 - 4\beta x(1 - x^2)$ , we have  $f'(1) = 8\gamma \geq 0$  and  $f'(1 - 3/\beta) \leq 8 - 4\beta(1 - 3/\beta)(3/\beta)(2 - 3/\beta) < 0$ .  
485 Thus,  $t_0 \in (1 - 3/\beta, 1]$ . Set  $r' = r - 3/\beta \geq r/2$ . Then

$$\int_{1-r}^{1+r} \exp(-f(x)) dx \geq \int_{t_0-r'}^{t_0+r'} \exp(-f(x)) dx.$$

486 For every  $t \in \mathbb{R}$  define  $I(t) = \int_t^{t+r'} \exp(-f(x)) dx$ . Since  $f$  is  $\beta$ -strongly convex on  $[a, \infty)$ , we  
 487 have for any  $t \geq t_0$  that

$$f(t+r') - f(t) \geq r' f'(t) + \frac{r'^2}{2} \beta \geq \frac{r'^2}{2} \beta$$

488 where the final inequality is because  $f'(t) \geq 0$  for  $t \in [t_0, \infty)$ . Thus, for any  $t \geq t_0$ ,

$$I(t+r') = \int_{t+r'}^{t+2r'} \exp(-f(x)) dx = \int_t^{t+r'} \exp(-f(x+r')) dx \leq \exp(-\beta r'^2/2) I(t).$$

489 By induction, for any  $k \in \mathbb{N}$  it holds that  $I(t_0 + kr') \leq \exp(-\beta k r'^2/2) I(t_0)$ , so

$$\int_{t_0}^{\infty} \exp(-f(x)) dx = \sum_{k=0}^{\infty} I(t_0 + kr') \leq I(t_0) \sum_{k=0}^{\infty} \exp(-\beta k r'^2/2) = \frac{I(t_0)}{1 - \exp(-\beta r'^2/2)}. \quad (9)$$

490 Similarly, for any  $t \in [a+r', t_0]$ , we have

$$f(t-r') - f(t) \geq -r' f'(t) + \frac{r'^2}{2} \beta \geq \frac{r'^2}{2} \beta$$

491 using  $\beta$ -strong convexity on  $[a, \infty)$  and the bound  $f'(t) \leq 0$  on  $[a, t_0]$ . Thus, for any  $t \in [a, t_0 - r']$ ,

$$I(t-r') = \int_{t-r'}^t \exp(-f(x)) dx = \int_t^{t+r'} \exp(-f(x-r')) dx \leq \exp(-\beta r'^2/2) I(t),$$

492 so by induction,  $I(t_0 - kr') \leq \exp(-\beta(k-1)r'^2/2) I(t_0 - r')$  for any  $1 \leq k \leq K := \lfloor (t_0 - a)/r' \rfloor$ .

493 It follows that

$$\int_{t_0 - Kr'}^{t_0} \exp(-f(x)) dx = \sum_{k=1}^K I(t_0 - kr') \leq I(t_0 - r') \sum_{k=1}^K \exp(-\beta(k-1)r'^2/2) \leq \frac{I(t_0 - r')}{1 - \exp(-\beta r'^2/2)}. \quad (10)$$

494 Finally, note that  $t_0 - (K-1)r' \leq a + 2r' \leq 0.8$ . For any  $x \in [0, 0.8]$ , we have  $f'(x) \leq 8x^7 -$   
 495  $0.72\beta x = x(8x^6 - 1.44\beta) \leq 0$ , since  $\beta > 150$ . That is,  $f$  is non-increasing on  $[0, t_0 - (K-1)r']$ .

496 It follows that

$$\begin{aligned} \int_0^{t_0 - Kr'} \exp(-f(x)) dx &\leq \frac{t_0 - Kr'}{r'} \int_{t_0 - Kr'}^{t_0 - (K-1)r'} \exp(-f(x)) dx \\ &\leq \frac{1}{r'} I(t_0 - Kr') \\ &\leq \frac{\exp(-\beta(K-1)r'^2/2)}{r'} I(t_0 - r'). \end{aligned}$$

497 Since  $(K-1)r' \geq t_0 - 0.8 \geq 1 - \frac{3}{\beta} - 0.8 \geq 0.1$ , we conclude that

$$\int_0^{t_0 - Kr'} \exp(-f(x)) dx \leq \frac{\exp(-\beta r'^2/20)}{r'} I(t_0 - r'). \quad (11)$$

498 Combining (9), (10), and (11), we get

$$\int_0^{\infty} \exp(-f(x)) dx \leq \left( \frac{1}{1 - \exp(-\beta r'^2/2)} + \frac{\exp(-\beta r'^2/20)}{r'} \right) \int_{t_0 - r'}^{t_0 + r'} \exp(-f(x)) dx.$$

499 Substituting in  $r' \geq r/2$  gives the claimed result.  $\square$

500 **Lemma A.9.** Fix  $\beta \geq 160 \log(8)$ . Then for any  $1 \leq k \leq 8$ ,

$$\int_0^{\infty} x^k \exp(-x^8 - \beta(1 - x^2)^2) dx \leq 2^k \int_0^{\infty} \exp(-x^8 - \beta(1 - x^2)^2) dx.$$

501 *Proof.* Define a distribution  $q(x) \propto \exp(-x^8 - \beta(1 - x^2)^2)$  for  $x \in [0, \infty)$ . We want to show that  
 502  $\mathbb{E}_q[x^k] \leq 2^k$ . Indeed,

$$\begin{aligned} \mathbb{E}_q[\exp(x^8)] &= \frac{\int_0^\infty \exp(-\beta(1 - x^2)^2) dx}{\int_0^\infty \exp(-x^8 - \beta(1 - x^2)^2) dx} \\ &\leq \frac{2 \int_{1/2}^{3/2} \exp(-\beta(1 - x^2)^2) dx}{\int_0^\infty \exp(-x^8 - \beta(1 - x^2)^2) dx} \\ &= 2\mathbb{E}_q[\exp(x^8) \mathbb{1}[1/2 \leq x \leq 3/2]] \\ &\leq 2 \exp((3/2)^8) \end{aligned}$$

503 where the first inequality is by an application of Lemma A.8 with  $r = 1/2$  and  $m = 1$ . Now by  
 504 Jensen's inequality we get

$$\mathbb{E}_q[x^8] \leq \log \mathbb{E}_q[\exp(x^8)] = \log(2) + (3/2)^8 \leq 2^8$$

505 and consequently, an application of Hölder inequality gives us  $\mathbb{E}_q[x^k] \leq 2^k$ , for any  $1 \leq k \leq 8$ .  $\square$

## 506 A.5 Proof of Corollary 3.6

507 **Proof of Corollary 3.6.** Recall that  $\log p_\theta(x) = \log h(x) + \langle \theta, T(x) \rangle - \log Z_\theta$ . Therefore  
 508  $L_{\text{MLE}}(\theta) = \hat{\mathbb{E}} \log h(x) + \langle \theta, \hat{\mathbb{E}} T(x) \rangle - \log Z_\theta$  and  $\nabla_\theta L_{\text{MLE}}(\theta) = \hat{\mathbb{E}} T(x) - \nabla_\theta \log Z_\theta$ . Note  
 509 that we can compute  $\hat{\mathbb{E}} \log h(x)$  and  $\hat{\mathbb{E}} T(x)$  exactly. It follows that if we can approximate  $L_{\text{MLE}}(\theta)$   
 510 up to an additive error of  $n \log 1.16$ , then we can compute  $\log Z_\theta$  up to an additive error of  $n \log 1.16$ .  
 511 Similarly, if we can compute  $\nabla_\theta L_{\text{MLE}}(\theta)$  up to an additive error of  $1/20$ , then we can compute  
 512  $\nabla_\theta \log Z_\theta$  up to an additive error of  $1/20$ . This contradicts Theorems 3.4 and 3.5 respectively,  
 513 completing the proof.  $\square$

## 514 B Moment bounds

515 **Lemma B.1** (Moment bound). *For any  $\theta \in \Theta_B$ ,  $i \in [n]$ , and  $\ell \in \mathbb{N}$  it holds that*

$$\mathbb{E}_{x \sim p_\theta} x_i^\ell \leq \max(2^\ell, B^\ell M^\ell 2^{\ell(d+1)+1}).$$

516 *Proof.* Without loss of generality assume  $i = 1$ . Let  $L_0 := \max(\ell, BM2^{d+1})$ . Then

$$\begin{aligned} \mathbb{E}_{x \sim p_\theta} x_1^\ell &\leq L_0^\ell + \mathbb{E}_{x \sim p_\theta} x_1^\ell \mathbb{1}[\|x\|_\infty > L_0] \\ &= L_0^\ell + \sum_{k=0}^\infty \mathbb{E}_{x \sim p_\theta} [x_1^\ell \mathbb{1}[2^k L_0 < \|x\|_\infty \leq 2^{k+1} L_0]] \end{aligned}$$

517 Now for any  $L \geq L_0$ ,

$$\begin{aligned} &\mathbb{E} [x_1^\ell \mathbb{1}[L < \|x\|_\infty \leq 2L]] \\ &= \frac{1}{Z_\theta} \int_{B_{2L}(0) \setminus B_L(0)} x_1^\ell \exp \left( - \sum_{i=1}^n x_i^{d+1} + \langle \theta, T(x) \rangle \right) dx \\ &\leq \frac{(2L)^n}{Z_\theta} (2L)^\ell \exp(-L^{d+1} + BM(2L)^d) \\ &\leq \frac{(2L)^{n+\ell} \exp(-L^{d+1}/2)}{Z_\theta}. \end{aligned}$$

518 We can lower bound  $Z_\theta$  as

$$\begin{aligned} Z_\theta &\geq \int_{B_{1/(BM)}(0)} \exp \left( - \sum_{i=1}^n x_i^{d+1} + \langle \theta, T(x) \rangle \right) dx \\ &\geq (BM)^{-n} \exp(-n(BM)^{-d-1} - BM(BM)^{-d}) \\ &\geq e^{-2} (BM)^{-n}. \end{aligned}$$

519 Thus,

$$\begin{aligned}\mathbb{E} [x_1^\ell \mathbb{1}[L < \|x\|_\infty \leq 2L]] &\leq \exp \left( (n + \ell) \log(2L) - \frac{1}{2} L^{d+1} + 2 + n \log(BM) \right) \\ &\leq \exp \left( -\frac{1}{4} L^{d+1} \right)\end{aligned}$$

520 since  $L$  was assumed to be sufficiently large (recall that we assume  $B \geq 1$ ). We conclude that

$$\begin{aligned}\mathbb{E}_{x \sim p_\theta} x_1^\ell &\leq L_0^\ell + \sum_{k=0}^{\infty} \exp \left( -\frac{1}{4} 2^{k(d+1)} L_0^{d+1} \right) \\ &\leq L_0^\ell + 1 \leq 2L_0^\ell\end{aligned}$$

521 which completes the proof.  $\square$

522 **Corollary B.2** (Largest eigenvalue bound). *For any  $\theta \in \Theta_B$ , it holds that*

$$\mathbb{E}_{x \sim p_\theta} T(x) T(x)^\top \preceq B^{2d} M^{2d+1} 2^{2d(d+1)+1}.$$

523 We also have the following consequences:

524 (a)  $\|\mathbb{E}_{x \sim p_\theta} T(x)\|_2^2 \leq B^{2d} M^{2d+2} 2^{2d(d+1)+1},$

525 (b)  $\lambda_{\max}(\mathcal{I}(\theta)) \leq B^{2d} M^{2d+1} 2^{2d(d+1)+1},$

526 (c)  $\Pr_{x \sim p_\theta} [\|x\|_\infty > 2^{d+3} n B M] \leq 1/2.$

527 *Proof.* Fix any  $u, v \in [M]$ . Then  $T(x)_u T(x)_v = \prod_{i=1}^n x_i^{\gamma_i}$  for some nonnegative integers  $\gamma_1, \dots, \gamma_n$   
528 where  $d' := \sum_{i=1}^n \gamma_i \leq 2d$ . Therefore

$$\mathbb{E}_{x \sim p_\theta} T(x)_u T(x)_v = \mathbb{E}_{x \sim p_\theta} \prod_{i=1}^n x_i^{\gamma_i} \leq \prod_{i=1}^n \left( \mathbb{E}_{x \sim p_\theta} x_i^{d'} \right)^{\gamma_i / d'} \leq B^{2d} M^{2d} 2^{2d(d+1)+1}$$

529 by Holder's inequality and Lemma B.1 (with  $\ell = 2d$ ). The claimed spectral bound follows. To prove  
530 (a), observe that

$$\|\mathbb{E}_{x \sim p_\theta} T(x)\|_2^2 \leq \mathbb{E}_{x \sim p_\theta} \|T(x)\|_2^2 = \text{Tr} \mathbb{E}_{x \sim p_\theta} T(x) T(x)^\top \leq M \lambda_{\max}(\mathbb{E}_{x \sim p_\theta} T(x) T(x)^\top)$$

531 To prove (b), observe that  $\mathcal{I}(\theta) \preceq \mathbb{E}_{x \sim p_\theta} T(x) T(x)^\top$ . To prove (c), observe that for any  $i \in [n]$ ,

$$\Pr_{x \sim p_\theta} [|x_i| > 2^{d+3} n B M] \leq \frac{\mathbb{E}_{x \sim p_\theta} x_i^{2d}}{(2^{d+3} n B M)^{2d}} \leq \frac{1}{2n}.$$

532 A union bound over  $i \in [n]$  completes the proof.  $\square$

533 **Lemma B.3** (Smoothness bounds). *For every  $\theta \in \Theta_B$ , it holds that*

$$\mathbb{E}_{x \sim p_\theta} \|\Delta T(x)\|_2^2 := \sum_{j=1}^M \mathbb{E}_{x \sim p_\theta} (\Delta T_j(x))^2 \leq d^4 B^{2d} M^{2d+1} 2^{2d(d+1)+1}$$

534 and

$$\mathbb{E}_{x \sim p_\theta} \|(JT)(x)\|_{op}^2 \leq n d^2 B^{2d} M^{2d+1} 2^{2d(d+1)+1}.$$

535 *Proof.* Fix any  $j \in [M]$ ; then there is a degree function  $\mathbf{d}$  with  $1 \leq |\mathbf{d}| \leq d$  so that  $T_j(x) = x_{\mathbf{d}} =$   
536  $\prod_{i=1}^n x_i^{\mathbf{d}(i)}$ . Therefore

$$\Delta T_j(x) = \sum_{k \in [n]: \mathbf{d}(k) \geq 2} \mathbf{d}(k)(\mathbf{d}(k) - 1) x_{\mathbf{d} - 2\{k\}} =: \langle w, T(x) \rangle$$

537 for some  $w \in \mathbb{R}^M$  with  $\|w\|_2^2 = \sum_{k \in [n]: \mathbf{d}(k) \geq 2} \mathbf{d}(k)^2 (\mathbf{d}(k) - 1)^2 \leq d^4$ . By Corollary B.2, we  
538 conclude that

$$\mathbb{E}_{x \sim p_\theta} (\Delta T_j(x))^2 = \mathbb{E}_{x \sim p_\theta} \langle w, T(x) \rangle^2 \leq n^2 d^4 B^{4d} M^{4d+2} 2^{4d(d+2)+1}.$$

Summing over  $j \in [M]$  gives the first claimed bound. For the second bound, observe that

$$\mathbb{E}_{x \sim p_\theta} \|(JT)(x)\|_{\text{op}}^4 \leq \mathbb{E}_{x \sim p_\theta} \|(JT)(x)\|_F^4 = \mathbb{E}_{x \sim p_\theta} \left( \sum_{j=1}^M \sum_{i=1}^n \left( \frac{\partial}{\partial x_i} T_j(x) \right)^2 \right)^2.$$

For any  $j \in [M]$  and  $i \in [n]$ , there is some degree function  $\mathbf{d}$  with  $|\mathbf{d}| \leq d$  and  $\frac{\partial}{\partial x_i} T_j(x) = |\mathbf{d}| \cdot x_{\mathbf{d}-\{i\}}$ . Thus, by Holder's inequality and Lemma B.1 (with  $\ell = 4d$ ), we get

$$\begin{aligned} \mathbb{E}_{x \sim p_\theta} \left( \sum_{j=1}^M \sum_{i=1}^n \left( \frac{\partial}{\partial x_i} T_j(x) \right)^2 \right)^2 &= \sum_{j,j' \in [M]} \sum_{i,i' \in [n]} \mathbb{E}_{x \sim p_\theta} \left( \frac{\partial}{\partial x_i} T_j(x) \right)^2 \left( \frac{\partial}{\partial x_{i'}} T_{j'}(x) \right)^2 \\ &\leq M^2 n^2 d^4 B^{4d} M^{4d} 2^{4d(d+2)+1} \end{aligned}$$

which proves the second bound.  $\square$

The following regularity conditions are sufficient for consistency and asymptotic normality of score matching, assuming that the Restricted Poincaré constant is finite and  $\lambda_{\min}(\mathcal{I}(\theta^*)) > 0$  (see Proposition 2 in Forbes and Lauritzen (2015) together with Lemma 1 in Koehler et al. (2022)). We show that these conditions hold for our chosen exponential family.

**Lemma B.4** (Regularity conditions). *For any  $\theta \in \mathbb{R}^M$ , the quantities  $\mathbb{E}_{x \sim p_\theta} \|\nabla h(x)\|_2^4$ ,  $\mathbb{E}_{x \sim p_\theta} \|\Delta T(x)\|_2^2$ , and  $\mathbb{E}_{x \sim p_\theta} \|(JT)(x)\|_{\text{op}}^4$  are all finite. Moreover,  $p_\theta(x) \rightarrow 0$  and  $\|\nabla_x p_\theta(x)\|_2 \rightarrow 0$  as  $\|x\|_2 \rightarrow \infty$ .*

*Proof.* Both of the quantities  $\|\nabla h(x)\|_2^4$  and  $\|\Delta T(x)\|_2^2$  can be written as a polynomial in  $x$ . Finiteness of the expectation under  $p_\theta$  follows from Holder's inequality and Lemma B.1 (with parameter  $B$  set to  $\|\theta\|_\infty$ ). Finiteness of  $\mathbb{E}_{x \sim p_\theta} \|(JT)(x)\|_{\text{op}}^4$  is shown in Lemma B.3 (again, with  $B := \|\theta\|_\infty$ ). The decay condition  $p_\theta(x) \rightarrow 0$  holds because  $\log Z_\theta = -\sum_{i=1}^n x_i^{d+1} + \langle \theta, T(x) \rangle$ . For  $x \in \mathbb{R}^n$  with  $L \leq \|x\|_\infty \leq 2L$ , the RHS is at most  $-L^{d+1} + M \|\theta\|_\infty (2L)^d$ , which goes to  $-\infty$  as  $L \rightarrow \infty$ . A similar bound shows that  $\|\nabla_x p_\theta(x)\|_2 \rightarrow 0$ .  $\square$

## C Omitted Proofs from Section 4

**Proof of Lemma 4.2.** We use the fact that the Legendre polynomials  $L_k(x) = \frac{1}{2^k} \sum_{j=0}^k \binom{k}{j}^2 (x-1)^{k-j} (x+1)^j$ , for integers  $0 \leq k \leq d$ , form an orthogonal basis for the vector space  $\mathbb{R}[x]_{\leq d}$  with respect to  $L^2[-1, 1]$  (see e.g. Koepf (1998)). We consider the normalized versions  $\hat{L}_k = \sqrt{\frac{2k+1}{2}} L_k$ , so that  $\|\hat{L}_k\|_{L^2[-1,1]} = 1$ . By tensorization, the set of products of Legendre polynomials

$$\hat{L}_{\mathbf{d}}(x) = \prod_{i=1}^n \hat{L}_{\mathbf{d}(i)}(x_i),$$

as  $\mathbf{d}$  ranges over degree functions with  $|\mathbf{d}| \leq d$ , form an orthonormal basis for  $\mathbb{R}[x_1, \dots, x_n]_{\leq d}$  with respect to  $L^2([-1, 1]^n)$ .

Using the formula for  $L_k$ , we obtain that the sum of absolute values of coefficients of  $L_k$  (in the monomial basis) is at most  $\frac{1}{2^k} \sum_{j=0}^k \binom{k}{j}^2 2^k = 2^k$ . By the bound  $\|\cdot\|_2 \leq \|\cdot\|_1$  and the definition of  $\hat{L}_k$ ,

$$\|\hat{L}_k\|_{\text{mon}}^2 \leq \frac{2k+1}{2} \|L_k\|_{\text{mon}}^2 \leq \frac{2k+1}{2} 2^{2k}$$

and hence for any degree function  $\mathbf{d}$  with  $|\mathbf{d}| \leq d$ ,

$$\begin{aligned} \|\hat{L}_{\mathbf{d}}\|_{\text{mon}}^2 &= \prod_{i=1}^n \|\hat{L}_{\mathbf{d}(i)}\|_{\text{mon}}^2 \leq \prod_{i=1}^n \frac{2\mathbf{d}(i)+1}{2} 2^{2\mathbf{d}(i)} \\ &\leq \prod_{i=1}^n e^{\mathbf{d}(i)} 2^{2\mathbf{d}(i)} \leq (4e)^d. \end{aligned}$$

567 Consider any polynomial  $f \in \mathbb{R}[x_1, \dots, x_n]_{\leq d}$ , and write  $f = \sum_{|\mathbf{d}| \leq d} a_{\mathbf{d}} \hat{L}_{\mathbf{d}}$ . By orthonormality, it  
 568 holds that  $\sum_{|\mathbf{d}| \leq d} a_{\mathbf{d}}^2 = \|f\|_{L^2([-1,1]^n)}^2$ . Thus, by the triangle inequality and Cauchy-Schwarz,

$$\begin{aligned} \|p\|_{\text{mon}}^2 &= \left\| \sum_{|\mathbf{d}| \leq d} a_{\mathbf{d}} \hat{L}_{\mathbf{d}} \right\|_{\text{mon}}^2 \leq \sum_{|\mathbf{d}| \leq d} a_{\mathbf{d}}^2 \cdot \sum_{|\mathbf{d}| \leq d} \|\hat{L}_{\mathbf{d}}\|_{\text{mon}}^2 \\ &\leq \|p\|_{L^2([-1,1]^n)}^2 \binom{n+d}{d} (4e)^d \end{aligned}$$

569 as claimed.  $\square$

570 **Proof of Lemma 4.3.** Let  $f \in \mathbb{R}[x_1, \dots, x_n]_{\leq d}$  be a polynomial of degree at most  $d$  in  $x_1, \dots, x_n$ .  
 571 Define  $g(x) = f(x) - \mathbb{E}_{x \sim p} f(x)$ . Set  $\epsilon = 1/(2(d+1)MR^d(n+B))$  and let  $(W_i)_{i \in I}$  be  $\ell_{\infty}$ -balls  
 572 of radius  $\epsilon$  partitioning  $\{x \in \mathbb{R}^n : \|x\|_{\infty} \leq R\}$ . Define random variable  $X \sim p|_{\{\|x\|_{\infty} \leq R\}}$  and  
 573 let  $\iota \in I$  be the random index so that  $X \in W_{\iota}$ . Then

$$\begin{aligned} \text{Var}_p(f) &= \mathbb{E}_{x \sim p}[g(x)^2] \\ &\geq \frac{1}{2} \mathbb{E}[g(X)^2] \\ &= \frac{1}{2} \mathbb{E}_{\iota} \mathbb{E}_X[g(X)^2 | X \in W_{\iota}] \end{aligned}$$

574 where the inequality uses guarantee (c) of Corollary B.2 that  $\Pr_{x \sim p}[\|x\|_{\infty} > R] \leq 1/2$ .

575 Thus, there exists some  $\iota^* \in I$  such that  $\mathbb{E}_X[g(X)^2 | X \in W_{\iota^*}] \leq 2 \text{Var}_p(f)$ . Let  $q : \mathbb{R}^n \rightarrow \mathbb{R}_+$  be  
 576 the density function of  $X | X \in W_{\iota^*}$ . Since  $q(x) \propto p(x) \mathbb{1}[x \in W_{\iota^*}]$ , for any  $u, v \in W_{\iota^*}$  we have that

$$\begin{aligned} \frac{q(u)}{q(v)} &= \frac{p(u)}{p(v)} = \frac{h(u) \exp(\langle \theta, T(u) \rangle)}{h(v) \exp(\langle \theta, T(v) \rangle)} \\ &= \exp \left( \sum_{i=1}^n v_i^{d+1} - u_i^{d+1} + \langle \theta, T(u) - T(v) \rangle \right). \end{aligned}$$

577 Applying Lemma C.1, we get that

$$\begin{aligned} \frac{q(u)}{q(v)} &\leq \exp(n(d+1)R^d \|u - v\|_{\infty} + MB \|T(u) - T(v)\|_{\infty}) \\ &\leq \exp((n+B) \cdot M(d+1)R^d \|u - v\|_{\infty}) \\ &\leq \exp(2\epsilon(n+B) \cdot M(d+1)R^d) \\ &\leq \exp(1) \end{aligned}$$

578 by choice of  $\epsilon$ . It follows that if  $\tilde{U}$  is the uniform distribution on  $W_{\iota^*}$ , then  $q(x) \geq e^{-1} \tilde{U}(x)$  for all  
 579  $x \in \mathbb{R}^n$ . Thus,

$$\text{Var}_p(f) \geq \frac{1}{2} \mathbb{E}_X[g(X)^2 | X \in W_{\iota^*}] \geq \frac{1}{2e} \mathbb{E}_{x \sim \tilde{U}}[g(x)^2] \geq \frac{1}{2e} \text{Var}_{\tilde{U}}(g) = \frac{1}{2e} \text{Var}_{\tilde{U}}(f)$$

580 as desired.  $\square$

581 **Lemma C.1.** Fix  $R > 0$ . For any degree function  $\mathbf{d} : [n] \rightarrow \mathbb{N}$  with  $|\mathbf{d}| \leq d$ , and for any  $u, v \in \mathbb{R}^n$   
 582 with  $\|u\|_{\infty}, \|v\|_{\infty} \leq R$ , it holds that

$$|u_{\mathbf{d}} - v_{\mathbf{d}}| \leq dR^{d-1} \|u - v\|_{\infty}.$$

583 *Proof.* Define  $m(x) = x_{\mathbf{d}} = \prod_{i=1}^n x_i^{\mathbf{d}(i)}$ . Then

$$\begin{aligned} |m(u) - m(v)| &\leq \|u - v\|_{\infty} \sup_{x \in \mathcal{B}_R(0)} \|\nabla_x m(x)\|_1 \\ &= \|u - v\|_{\infty} \sup_{x \in \mathcal{B}_R(0)} \sum_{i \in [n] : \mathbf{d}(i) > 0} \alpha_i \prod_{j=1}^n x_j^{\mathbf{d}(j) - \mathbb{1}[i=j]} \\ &\leq \|u - v\|_{\infty} \cdot dR^{d-1} \end{aligned}$$

584 as claimed.  $\square$

585 **Proof of Lemma 4.4.** By Lemma 4.3, there is some  $z \in \mathbb{R}^n$  with  $\|z\|_\infty \leq R$  and some  $\epsilon \geq$   
 586  $1/(2(d+1)MR^d(n+B))$  so that if  $\tilde{\mathcal{U}}$  is the uniform distribution on  $\{x \in \mathbb{R}^n : \|x - z\|_\infty \leq \epsilon\}$ ,  
 587 then

$$\text{Var}_p(f) \geq \frac{1}{2e} \text{Var}_{\tilde{\mathcal{U}}}(f).$$

588 Define  $g : \mathbb{R}^n \rightarrow \mathbb{R}$  by  $g(x) = f(\epsilon x + z) - \mathbb{E}_{\tilde{\mathcal{U}}} f$ . Then by Lemma 4.2,

$$\begin{aligned} \|g\|_{\text{mon}}^2 &\leq (4e)^d M \mathbb{E}_{x \sim \text{Unif}([-1,1]^n)} g(x)^2 \\ &= (4e)^d M \text{Var}_{\tilde{\mathcal{U}}}(f) \\ &\leq (4e)^{d+1} M \text{Var}_p(f). \end{aligned}$$

589 Write  $f(x) = \sum_{1 \leq |\mathbf{d}| \leq d} \alpha_{\mathbf{d}} x_{\mathbf{d}}$  and  $g(x) = \sum_{1 \leq |\mathbf{d}| \leq d} \beta_{\mathbf{d}} x_{\mathbf{d}}$ . We know that  $f(x) = g(\epsilon^{-1}(x - z)) +$   
 590  $\mathbb{E}_{\tilde{\mathcal{U}}} f$ . Thus, for any nonzero degree function  $\mathbf{d}$ , we have

$$\alpha_{\mathbf{d}} = \sum_{\substack{\mathbf{d}' \geq \mathbf{d} \\ |\mathbf{d}'| \leq d}} \epsilon^{-|\mathbf{d}'|} (-z)^{\mathbf{d}' - \mathbf{d}} \beta_{\mathbf{d}'}.$$

591 Thus  $|\alpha_{\mathbf{d}}| \leq \epsilon^{-d} R^d \|\beta\|_1 \leq \epsilon^{-d} R^d \sqrt{M} \|g\|_{\text{mon}}$ , and so summing over monomials gives

$$\|f\|_{\text{mon}}^2 \leq M^2 \epsilon^{-2d} R^{2d} \|g\|_{\text{mon}}^2 \leq (4e)^{d+1} M^3 \epsilon^{-2d} R^{2d} \text{Var}_p(f).$$

592 Substituting in the choice of  $\epsilon$  from Lemma 4.3 completes the proof.  $\square$

## 593 D Omitted Proofs from Section 5

594 **Proof of Lemma 5.1.** We have

$$\begin{aligned} \text{Var}_{p_\theta}(f) &= \mathbb{E}_{x \sim p_\theta} [f(x)^2] - \mathbb{E}_{x \sim p_\theta} [f(x)]^2 \\ &= w^\top \mathbb{E}_{x \sim p_\theta} [T(x) T(x)^\top] w - w^\top \mathbb{E}_{x \sim p_\theta} [T(x)] \mathbb{E}_{x \sim p_\theta} [T(x)]^\top w \\ &= w^\top \mathcal{I}(\theta) w, \end{aligned}$$

and since

$$\|w\|_2^2 \lambda_{\min}(\mathcal{I}(\theta)) \leq w^\top \mathcal{I}(\theta) w \leq \|w\|_2^2 \lambda_{\max}(\mathcal{I}(\theta)),$$

595 the lemma statement follows.  $\square$

596 **Proof of Lemma 5.3.** Since  $f(x) = \sum_{1 \leq |\mathbf{d}| \leq d} w_{\mathbf{d}} x_{\mathbf{d}}$ , we have for any  $u \in \mathbb{R}^n$  that

$$\langle u, \nabla_x f(x) \rangle = \sum_{i=1}^n u_i \sum_{0 \leq |\mathbf{d}| < d} (1 + \mathbf{d}(i)) w_{\mathbf{d} + \{i\}} x_{\mathbf{d}} = c(u) + \sum_{1 \leq |\mathbf{d}| < d} \tilde{w}(u)_{\mathbf{d}} x_{\mathbf{d}}$$

597 where  $c(u) := \sum_{i=1}^n u_i w_{\{i\}}$  and  $\tilde{w}(u)_{\mathbf{d}} := \sum_{i=1}^n u_i (1 + \mathbf{d}(i)) w_{\mathbf{d} + \{i\}}$ . But now

$$\begin{aligned} \mathbb{E}_{x \sim p_\theta} [\|\nabla_x f(x)\|_2^2] &= \mathbb{E}_{x \sim p_\theta} \mathbb{E}_{u \sim N(0, I_n)} \langle u, \nabla_x f(x) \rangle^2 \\ &= \mathbb{E}_{u \sim N(0, I_n)} \mathbb{E}_{x \sim p_\theta} (c(u) + \langle \tilde{w}(u), T(x) \rangle)^2 \\ &\geq \mathbb{E}_{u \sim N(0, I_n)} \frac{c(u)^2 + \|\tilde{w}(u)\|_2^2}{4 + 4 \|\mathbb{E}_{x \sim p_\theta} [T(x)]\|_2^2} \min(1, \lambda_{\min}(\mathcal{I}(\theta))). \end{aligned}$$

598 where the last inequality is by Lemma 5.2. Finally,

$$\begin{aligned} \mathbb{E}_{u \sim N(0, I_n)} [c(u)^2 + \|\tilde{w}(u)\|_2^2] &= \sum_{0 \leq |\mathbf{d}| < d} \mathbb{E}_{u \sim N(0, I_n)} \left[ \left( \sum_{i=1}^n u_i (1 + \mathbf{d}(i)) w_{\mathbf{d} + \{i\}} \right)^2 \right] \\ &= \sum_{0 \leq |\mathbf{d}| < d} \sum_{i=1}^n (1 + \mathbf{d}(i))^2 w_{\mathbf{d} + \{i\}}^2 \geq \|w\|_2^2 \end{aligned}$$

599 where the second equality is because  $\mathbb{E}[u_i u_j] = \mathbb{I}[i = j]$  for all  $i, j \in [n]$ , and the last inequality is  
600 because every term  $w_{\mathbf{d}}^2$  in  $\|w\|_2^2$  appears in at least one of the terms of the previous summation (and  
601 has coefficient at least one). Putting everything together gives

$$\begin{aligned}\mathbb{E}_{x \sim p_\theta} [\|\nabla_x f(x)\|_2^2] &\geq \frac{\|w\|_2^2}{4 + 4 \|\mathbb{E}_{x \sim p_\theta}[T(x)]\|_2^2} \min(1, \lambda_{\min}(\mathcal{I}(\theta))) \\ &\geq \frac{1}{4 + 4 \|\mathbb{E}[T(x)]\|_2^2} \frac{\min(1, \lambda_{\min}(\mathcal{I}(\theta)))}{\lambda_{\max}(\mathcal{I}(\theta))} \text{Var}_{p_\theta}(f)\end{aligned}$$

602 where the last inequality is by Lemma 5.1. □
